# Supplementary material for: Engineered Cas12i2 is a versatile high-efficiency platform for therapeutic genome editing
Source: PubMed Central journal article supplement (PMC9122993; doi:10.1038/s41467-022-30465-7), 2022-05-20
Supplement: 41467_2022_30465_MOESM2_ESM.pdf [file 41467_2022_30465_MOESM2_ESM.pdf]

1

2

3 Engineered Cas12i2 is a versatile high-efficiency platform for therapeutic genome

4 editing

5 McGaw, C., et al.

6

7

8

9

10 **Supplementary Materials and Tables**

11

12

13

14

15

16

17

18

19

## 20 **Supplementary Methods**

21

### 22 ***In vitro* expression of SpCas9 and *in vitro* cleavage assay**

23 The reconstituted cell-free protein synthesis system was manufactured at Arbor  
24 Biotechnologies using protocols derived from previous publications<sup>1, 2</sup>. The cell-free  
25 protein synthesis reagents were used in 25  $\mu$ L reactions containing 150 ng of the linear  
26 DNA template encoding SpCas9, 40 units murine RNAase inhibitor (40 U/ $\mu$ L), 2 nM *in*  
27 *vitro* transcribed target and non-target gRNA, and 150 ng GFP target DNA (sequences  
28 in Supplementary Table 2). The reactions were incubated at 37°C and aliquots (2.5  $\mu$ L)  
29 were taken at different time points for both protein expression and DNA cleavage  
30 analysis. For protein expression analysis, aliquots were mixed with 7.5 water and 2.5  $\mu$ L  
31 NuPAGE LDS Sample Buffer (Thermo Fisher #NP0007) supplemented with 10 mM  
32 DTT. After heating at 95°C for 2 minutes, the samples were analyzed on 4-12% Bis-Tris  
33 NuPAGE gel (Thermo Scientific #NP0321BOX) (Supplementary Fig. 3a). For *in vitro*  
34 DNA cleavage analysis, aliquots were mixed with 7.5 water and treated with RNase  
35 Cocktail Enzyme mix and Proteinase K (Thermo Scientific #EO0491) at 37°C for 20  
36 min. The samples were analyzed on 6% TBE gel (Thermo Scientific EC6265BOX)  
37 (Supplementary Fig. 3b).

38

### 39 **Description of the *in vitro* fluorescent reporter assay**

40 The fluorescent reporter assay was designed to couple the effector and gRNA synthesis  
41 with a fluorescent reporter-based activity assay (Supplementary Fig. 4a). The CRISPR-  
42 Cas effectors (Cas12i and SpCas9), pre-crRNA or gRNAs, and *E. coli* transcription  
43 factor sigma factor 28 ( $\sigma^{28}$ ) were expressed under the T7 promoter ( $P_{T7}$ ), whereas  
44 green and red fluorescent protein (GFP and RFP) reporters were expressed under the  
45 control of a  $\sigma^{28}$ -dependent promoter (fliC). Pre-crRNAs and gRNAs were designed to  
46 target GFP, but not RFP. The RFP served as an internal control for gene expression  
47 and fluorescence measurement. The fluorescence of the reaction mixture was  
48 measured over a course of 12 hrs.

49 This assay is a mix-and-read one-pot reaction in which DNA templates are all added  
50 at the beginning to initiate *in vitro* transcription and protein synthesis. As the *in vitro*  
51 reaction starts, the effector and gRNA are produced immediately due to the strong T7  
52 promoter, whereas GFP and RFP (under fliC promoter) are not produced until enough  
53  $\sigma^{28}$  protein is made. The delay in GFP expression provides time for newly synthesized  
54 effector and gRNA to form a ribonucleoprotein complex (RNP) that cleaves the GFP  
55 DNA template. DNA cleavage in the GFP-coding region abolishes or decreases GFP  
56 production, resulting in a depletion of GFP fluorescence compared to non-target gRNA  
57 that targets a site outside of the GFP gene. RFP, on the other hand, is expressed in the  
58 same reaction without the RNP interference, generating RFP protein as a control for  
59 normalizing GFP signals (Supplementary Fig. 4a).

60

61 **Validation of the *in vitro* fluorescence reporter assay with SpCas9 and Cas12i2**

62 **WT**

63 SpCas9 was chosen as both a control and a benchmark to validate the assay  
64 (Supplementary Fig. 4b-d). Initially, we set up *in vitro* reactions expressing SpCas9,  
65 non-target gRNA, and gRNAs targeting two GFP sites (target 9 and 10). GFP and RFP  
66 fluorescence was measured every 10 min at 37°C for 18 hr. Both GFP-targeting gRNAs  
67 almost completely abolished GFP fluorescence compared to the non-target gRNA  
68 control (Supplementary Fig. 4b, target 9 and 10), suggesting that *in vitro* synthesized  
69 SpCas9 efficiently cleaved the GFP template and prevented GFP expression. RFP  
70 fluorescence, on the other hand, remained relatively unchanged between targets and  
71 non-target, as the RFP template was not the target for SpCas9 (Supplemental Fig. 4c).  
72 The small variations of target and non-target RFP fluorescence were likely caused by  
73 variations in gene expression and fluorescence measurement, which was accounted for  
74 by normalizing GFP with RFP fluorescence. Depletion values, calculated as the ratios of  
75 normalized non-target gRNA fluorescence over normalized target gRNA fluorescence,  
76 was plotted to show that GFP fluorescence was efficiently depleted by SpCas9 over 20-  
77 fold for both targets after ~ 5 hr (Supplemental Fig. 4d).

78 Similar reactions were performed with Cas12i2 WT on two GFP sites showing GFP  
79 fluorescence was depleted only ~2 fold after ~ 5 hr for both targets (Supplementary  
80 Fig.4 e-g). The low depletion of Cas12i2 was due to substantial GFP fluorescence still  
81 remaining in the presence of GFP-targeting gRNAs (Supplementary Fig. 4e), indicating  
82 that *in vitro* synthesized Cas12i2 WT in these experiments failed to completely cleave  
83 the GFP template to prevent GFP expression.

84 To expand the assay with more targets, we showed that expression of SpCas9 and  
85 gRNAs targeting 10 targets in the GFP gene resulted in a decrease of GFP signals by

86 an average of 27.7-fold (Supplementary Fig. 5). In comparison, Cas12i2 WT decreased  
87 GFP signals by only 1.9-fold across 20 targets (Supplementary Fig. 5). These data are  
88 consistent with the low editing efficiency observed for Cas12i2 WT compared to SpCas9  
89 in HEK293T cells (Fig. 1a). Though the *in vitro* fluorescence reporter assay measures  
90 both cell-free expression and *in vitro* cleavage activity, we hypothesized that the fold-  
91 decrease in GFP signal (depletion) of Cas12i2 WT correlates with the intrinsic DNA  
92 targeting activity of the effector, and therefore, could be used to screen mutations with  
93 improved dsDNA cleavage activity, which might translate to enhanced editing activity in  
94 mammalian cells.

95

#### 96 **In silico off-target prediction and off-target analysis**

97 For each target, potential off-target sites within an edit distance of 4 were identified by  
98 searching for genomic sequences adjacent to the PAM (ABR001: TTN, spCas9: NRG),  
99 the Levenshtein distance between the target sequence and these PAM-adjacent  
100 sequences was calculated, and sequences with an edit distance greater than 4 were  
101 removed. The top predicted off-targets were selected by sorting the off-targets by edit  
102 distance and the number of mismatches. Primer pairs for each off-target site were  
103 generated by centering the off-target sequence within a 120-140 base pair amplicon,  
104 and targeted amplicon sequencing was performed using these primers. The sequencing  
105 data was analyzed using the indel analysis pipeline as described above, with an  
106 additional step to correct for background noise using the indel rate of paired negative  
107 control samples as a prior in maximum likelihood estimation (MLE).

108

109

110

111

112 **Supplementary Table 1. Comparison of Cas12i with type II Cas9 and other type V**113 **Cas12 systems**

| Ortholog family                             | effector   | Size (aa) | pre-crRNA processing | Tracr RNA | PAM       | dsDNA cleavage | ssDNA cleavage |
|---------------------------------------------|------------|-----------|----------------------|-----------|-----------|----------------|----------------|
| Type II, Cas9 <sup>3</sup>                  | SpCas9     | 1368      | no                   | yes       | 3'NGG     | Blunt cut      | no             |
| Type V-A, Cas12a <sup>4</sup>               | AsCpf1     | 1307      | yes                  | no        | 5'TTTV    | 5' overhang    | yes            |
| Type V-B, Cas12b <sup>5</sup>               | BhCas 12b  | 1108      | no                   | yes       | 5'ATTN    | 5' overhang    | yes            |
| Type V-E, Cas12e <sup>6</sup> (CasX)        | DpbCasX    | 986       | no                   | yes       | 5'TTCN    | 5' overhang    | minimal        |
| Type V-F, Cas12f (Cas14) <sup>7, 8, 9</sup> | UniCas 12f | 529       | no                   | yes       | 5'TTTN    | yes            | yes            |
| Type V-J (Cas12j) <sup>10, 11</sup>         | Cas phi    | 700-800   | yes                  | no        | 5' T-rich | yes            | yes            |
| Type V-I, Cas12i <sup>12</sup>              | Cas12i1    | 1093      | yes                  | no        | 5'TTN     | yes            | yes            |
|                                             | Cas12i2    | 1054      | yes                  | no        | 5'TTN     | yes            | yes            |

114

115

116 **Supplementary Table 2. A list of DNA sequences used in fluorescent reporter**  
117 **assay**

118

| Name                                        | Sequence                                                                                                                                                                                                                                                                                                                                                                                                                                                                                                                                                                                                                                                                                                                                                                                                                                                                                                                                                                                                                                                                                                                                                                                                                                                                                                                                                                                                                                                                                                                                                                                                                                                                                                                                                                                                                                                                                                                                                                                                                                                                                                                                                                                                                                                                                                                                                                                                                                                                                                                                                                                                                                                                                                                                         |
|---------------------------------------------|--------------------------------------------------------------------------------------------------------------------------------------------------------------------------------------------------------------------------------------------------------------------------------------------------------------------------------------------------------------------------------------------------------------------------------------------------------------------------------------------------------------------------------------------------------------------------------------------------------------------------------------------------------------------------------------------------------------------------------------------------------------------------------------------------------------------------------------------------------------------------------------------------------------------------------------------------------------------------------------------------------------------------------------------------------------------------------------------------------------------------------------------------------------------------------------------------------------------------------------------------------------------------------------------------------------------------------------------------------------------------------------------------------------------------------------------------------------------------------------------------------------------------------------------------------------------------------------------------------------------------------------------------------------------------------------------------------------------------------------------------------------------------------------------------------------------------------------------------------------------------------------------------------------------------------------------------------------------------------------------------------------------------------------------------------------------------------------------------------------------------------------------------------------------------------------------------------------------------------------------------------------------------------------------------------------------------------------------------------------------------------------------------------------------------------------------------------------------------------------------------------------------------------------------------------------------------------------------------------------------------------------------------------------------------------------------------------------------------------------------------|
| <p>pUCKO<br/>1_PfliC<br/>_mh6_<br/>dGFP</p> | <pre> cccctgtattactgttatgtaagcagacaggatgctgccggcgtagaggatcgagatctccaaaaatggctgttttgaaaaaattctaaaggtgtttacgacaga cgataacagggtgaaataatgtttaaacttaagaaggagattaaatatgaaaatcgaagaaggtaaaggccaccatcaccatcaccacggatccatgacggcat tgacggaagggtgcaaaactgtttgagaaagagatcccgatatacaccgaactggaaggcgacgctgaaggatgaaattatcattaagcgagggtaccgggga cgcgaccacgggtaccattaagcgaatacactgactacggcgacgtccgggtcccggtggcaaccctggtgagcaccctgagctacgggtttagctgtttcg ccaagtaccggagccacatcaaggattcttaagagcgccatgccggaagggtatacccaagagcgtaccatcagctcgaaggcgacggcgtgtacaagacgc gtgctatggttacctacgaacgggttctactacaactcgtgcacgctgactggtgagaactttaagaaagacgggtcacattctgcgtaagaactgttaccatgccc cgcaagcattctgtataattctgcctgacaccgttaacaatggcatccggttgactgtaaccaggcgtacgatattgaagggtgaccgaaaaactggttaccatgccc agccaaatgaatcgtccgttgccggctccgcgagtcatacccgggtatcatcaccatcaccacaccaaactgagcaaaagaccgacgagcgcggctg atcacatgtctgtgtagaggctgaaagcgggtgactgacacgatcatgataaaaaagcccgaaggaagctgagttggctgctgccaccgctgagcaataa ctagcataacccttgggctctaaacgggtctgaggggtttttgctgaaaggaggaactatccggctcctcgtcactgactcgtcgctcggctgttcggctg cggcgagcgggtacagctcactcaaaaggcgttaacaggtatccacagaatcaggggataacgaggaaagaacatgtgagcaaaagccagcaaaagcc aggaaccgtaaaagccggtgtggtgtttccataggctccgccccctgacgagcatcaaaaaatcgacgctcaagtcagaggtggcgaaccggaca ggactataagataccagggtttccctggaagctcctcgtgctcctgttccgacctgcccgtaccggatacctgccccttctccctcggaagcgtgg cgcttctcatagctcagcgtgtaggtatctcagttcgggtgtagctgtcctcaagctgggctgtgtgcacgaacccccgtcagcccaccgctgcccctatccgg taactatcgtcttgagccaaccggtaagacacgactatgccactggcagcagccactggtaacaggattagcagagcgggtatgtagggctgtacagagtt ctgaagtggtggcctaactacggctacactagaagaacagatattggtatctgcgctcgtggaagccagttacctcggaagaggtggtgagcttctgacggca aacaaccaccgctggtagcgggtgtttttgttgaagcagcagattacgcgcaaaaaaaggatctcaagaagatcctttagcttttctacggggtgacgctc agtgaacgaaaactcaggggtggcacttttcgggaaatgtgcggaacccctattgttattttctaaatacattcaaatatgtatccgctcatgaattaattctaga aaaactcatgagcatcaaatgaaactgcaatttattcatatcaggattacaatacattttgaaaaagccggttctgtaatgaaaggaaaaactcaccgagcgag ttccataggatggcaagatcctggtatcgtctcggattccgactcgtccaacatcaatacaacctattaattcccctcgtcaaaaaataaggttatcaagtgagaaatca ccatgagtgacgactgaatccggtgagaatggcaaaagttagcattttccagactgttcaacagggccagccattacgctcgtcatcaaaactcactcgtcatcaac caaaccttattcattcgtgattgcccctgagcagacgaaatcgcgactcgtttaaaggacaattacaacaggaatcgaatgcaaccggcgcaggaact gccagcgcacacaataatttcacctgaatcaggatattcttaatacctggaatgctgtttcccgggatcgagtggtgagtaacctgcatcatcaggagtcagg ataaaatgctgtaggtcgaagaggcataaattccgtcagccagtttagtctgacctctcatctgtaacatcattggcaacgctacctttgcatgttcagaaaact ctggcgcacgggctccatacaatcagatagttgtgcacctgattgcccacattatcgcgagccattataccatataaatcagcatccatgttgaatataatcg cggcctagagcaagacgttcccgtgaaatggtcataaca </pre> |
| <p>pUCKO<br/>1_PfliC<br/>_mh6_<br/>RFP</p>  | <pre> cccctgtattactgttatgtaagcagacaggatgctgccggcgtagaggatcgagatctccaaaaatggctgttttgaaaaaattctaaaggtgtttacgacaga cgataacagggtgaaataatgtttaaacttaagaaggagattaaatatgaaaatcgaagaaggtaaaggccaccatcaccatcaccacggatccatggtcagca agggggagggaagacaatatggttattcaaggaattcatgctcctcaagggtcagatggaaggaaagcgtgaaatggacacgaatcagagatcgaaggcggggg gagggtgccctttagaaggcacacaaacagctaaaactgaaatgacgaaggggggcccttccctcgttgggacattctttaccccagttcatgtatggttcaa aggcttatgtcaagcaccggcgacattccagactactaaaattgctgtccccgaggggtttaaagggaacgcttatgaatttcgaggtggggagctgtaac ggttaccaggacagtagcctgaggatgagcagttactcaaaagtgaattgcccgggacgaactccctagcagtgggcagtcagcaagaaaactgat gggtagggaaagcgtcatccgagcgcagatctcctgaagatggtgctttaaagggtgagatcaagcagcgttgaactgaaggacggggccattatgatgctgaag ttaaaccgacatataaggccaagaagccagttcaactgccagggctataatgttaattaaattagacattacgagccataatgaagattacagattgtcagcaga </pre>                                                                                                                                                                                                                                                                                                                                                                                                                                                                                                                                                                                                                                                                                                                                                                                                                                                                                                                                                                                                                                                                                                                                                                                                                                                                                                                                                                                                                                                                                                                                                                                                                                                                                                                                                                                                                                                                      |

|                                    |                                                                                                                                                                                                                                                                                                                                                                                                                                                                                                                                                                                                                                                                                                                                                                                                                                                                                                                                                                                                                                                                                                                                                                                                                                                                                                                                                                                                                                                                                                                                                                                                                                                                                                                                                                                                                                                                                                                                                                                   |
|------------------------------------|-----------------------------------------------------------------------------------------------------------------------------------------------------------------------------------------------------------------------------------------------------------------------------------------------------------------------------------------------------------------------------------------------------------------------------------------------------------------------------------------------------------------------------------------------------------------------------------------------------------------------------------------------------------------------------------------------------------------------------------------------------------------------------------------------------------------------------------------------------------------------------------------------------------------------------------------------------------------------------------------------------------------------------------------------------------------------------------------------------------------------------------------------------------------------------------------------------------------------------------------------------------------------------------------------------------------------------------------------------------------------------------------------------------------------------------------------------------------------------------------------------------------------------------------------------------------------------------------------------------------------------------------------------------------------------------------------------------------------------------------------------------------------------------------------------------------------------------------------------------------------------------------------------------------------------------------------------------------------------------|
|                                    | <p>atacgagcgcgagaaggacgccactcaacgggggcatggacgagctgtacaagtaaaaagcccgaaggaagctgagttggctgtgccaccgctgagca<br/> ataactagcataacccttggggcctctaaacgggtcttgaggggtttttgctgaaaggaggaactataatccggcttctctgctactgactgctgctgctggtcgt<br/> gctgctggcgagcggatcatgctcactcaaaggcggaataacgggtatccacagaatcaggggataacgcaggaagaacatgtgagcaaaaggccagcaaaag<br/> gccaggaaccgtaaaaaggccgctgtgctgctgttttccataggctccgccccctgacgagcatcaaaaaatcgacgctcaagtcagaggtggcgaaccgg<br/> acaggactataaagataaccaggcgtttccccctggaagctccctgctgctctctgtccgaccctgcccgttaccggatacctgccccttctccctcgggaagc<br/> gtggcgtttctcatagctcagctgtaggtatctcagttcgggtgtaggtcgtctccaagctggcgtgtgcacgaacccccgttcagcccagcctgctgcctat<br/> ccggtaactatcgtctgagccaacccggtaagacacgacttatccactggcagcagccactggtaacaggattagcagagcggatgtaggcgggtgctaca<br/> gagttctgaaagtggtgacctaacggctacactagaagaacagtttggatctgctgctctgtaagccagttacctcgaaaaagagttggtagctcttgatcc<br/> ggcaaaaaaccaccgctggtagcgggtgtttttgttcaagcagcagattacgctgagcaaaaaaggtactcaagaagatccttgatctttctacgggtgctga<br/> cgctcagtggaacgaaactcaggggtgacgttttccgggaaatgtgcgcaacccctattgttttttaataatcacaatgatccgctcatgaaataatc<br/> ttagaaaaactcatcgagcatcaaatgaaactgcaattattcatatcaggattatcaataccataatgttgaaaaagccgttctgtaatgaaggagaaaactcaccgag<br/> gcagttccatagtaggcaagatcctggtatcggtctgctgactccgactctccaacatcaatacaacctattaatccccctgcaaaaaataaggtatcaagtgagaa<br/> atccatgagtgacgactgaatccgggtgagaatggcaaaagttatgcaattcttccagactgttcaacaggccagccattacgctcgtcatcaaaactcactgcatc<br/> aaccaaaaccgttattcctgtgattgctgctgagcagcaaaatacgcgactcgtgttaaaaggacaattacaacaggaatcgaatgcaaccggcgcagga<br/> cactgccagcgcatacaaatttcacctgaatcaggatattcttaatacctggaatgctgtttccggggatcgagtggtgagtaaccatgcatcatcaggagta<br/> cggataaatgctgtaggtcggagaggcataaatccgtcagccagtttagctgaccatctcatgtaacatcattggcaacgctactttgccatgttcagaaaca<br/> actctggcgcacggctccatacaatcgatagattgctgcacctgattgcccacattatcgcgagcccattataccatataaatcagcatccatgttgaattaat<br/> cgcgccctagagcaagcgtttccggttgaatatggctcataaca</p> |
| T7_Sig<br>ma28                     | <p>cccgcgaaattaacgactcactataggggaattgtgagcggataacaattcccctctagaaaataatgtttaaactttaagaaggagatttaaatgaaaatcgaa<br/> gaaggtaaaggccaccatcaccatcaccacgggtgcatatgaactcgtttatacggctgaggggtcatggacaagcatagtttgggcaacgctatgttctctgtg<br/> cgtcagcagcgttacgfttaacaagtcgcttctctcgcgagcgtcgaattagatgacttatacaagcgggagggatcgggtattgaatgcagtagaacgctacgacg<br/> ctctcaggggacggcttccagcagctatgagctccagcgtatccgaggcaatgtagatgagctgcttctcgtgattgggtccgcgagcgtgctgtaatgct<br/> cgtgaggtgtctcaagccatcggccagctggaacaagaactgggtcgaatgcccacagagactgaagtgagaacgcttagggatgcattgcgattatcgtc<br/> aaatgttattggacactaacaattctcagttattctctacgacgaatggcgtgagaacacggagactcaatcgagcttgcactgacgaccaccagcgcgagaatc<br/> cgttcagcagttattgactcaaacctcgtcagcgtgtaggaagccattgaaacctgcccgaacgtgagaagctggtagcttatactatcaggaagagtta<br/> aatctaaagagattggtgctgttttgaagttgggagtcacgcgtgcacaactgactcacaggccatcaagcgttgcgaccaagtagggaaacttaataact<br/> gtaacaaaagcccgaaggaagctgagttgctgctgccaccgctgagcaataactagcataacccttggggcctctaaacgggtctgaggggtttttgctgaaa<br/> ggaggaactatatccgg</p>                                                                                                                                                                                                                                                                                                                                                                                                                                                                                                                                                                                                                                                                                                                                                                                                                                                                                                                                    |
| T7_Ca<br>s12i2_<br>Effector<br>_wt | <p>cccgcgaaattaacgactcactataggggaattgtgagcggataacaattcccctctagatttacactttatgcttccggctcgtatgtttctagaaagcttaataatftt<br/> gtttaaacttaagaaggagatttaaatgaaaatgaaaggaagtaagggtcaccatcaccatcaccacatgagcagcgcgatcaaaagctacaagagcgttctgctg<br/> tccgaacgagcgttaagaaccaactgctgaaagcaccattcagtcctggaagacggtagcgcgttcttttcaagatgctgaaggcctgtttggtgcatcacc<br/> ggagattgttctttcagcaccgaacaggagaaaacagcaacaggatcgcgctggtgctgctggttaactgggtccgctccggtgagccaagacagcctgaccac<br/> accatgagcgcgataacctggtggagaagttgaggaatactatggtgacccgcgagcgcgcatcaaacagtaactcagcgcgagcattgcaagagctact<br/> attggaacgactcgcgtcaacagctactatgatctgctgctgagctgggtgtaggtgagcgcagcctgaccatgatctggagatcctgctgcaaaagtcctggc<br/> ggttgcaaccgagagcaaccagaacaacagcatcattagcgttctgtttgcaaccggcgaaaaagaggaccgtgagaaactcgtatccaagaaaattct</p>                                                                                                                                                                                                                                                                                                                                                                                                                                                                                                                                                                                                                                                                                                                                                                                                                                                                                                                                                                                                                                                                                                                                                                                 |



ggaggcgatcagcaacctgaaagaaatcccgaagaacgttgcgccgattcaagagatcattctgaacgtggcgaagcgaccaaggaacctcgcaggtg  
atcggggtaacctgggtgcccagcaccctggagaaatctatcggaaggacggccaaaaagagttcgatctgaagaaactgcagaccgacctgaagaaagt  
attctgtgtaaaagcaaggagcgtgattggtgctgccgaagagctgctagctagtgaggcaaaacaccatccagatgacctgtggcggtggggcgaatgt  
tcaacaaagcgcacaccgctgaaaatcaagagcaccgtaactacaacttgcgaagcaacgtctggaacagttcaaaagagattcagagcctgaacaacctg  
ctggtgtgaaagactgaacgacttttcgatagcgaatcttcagcggcgaggaaacctacaccatctcggttcacatctgggtggcaaggacctgagcaaacgt  
ataaggcgtggaggatgatccggcgaccggaaaacgagattggttctgtgagcagatctgaaaaacaacttaagaaagagccgatccgtaacattctgctg  
tacatctcaccatctgcaagaatgcagcgcgaggacatcctggcggcggcaagtaaccaacagctggatcgttataaaagccaaaaggcgaacctgag  
cgttctgggtaaccagggtttacctggaccaacgctgacctgcccgggagaaggcgacgctaacgaccgtccgaacagcctggatctgctattggctgac  
gaaactgctcaccggagcgtgctggaagaaacaccatcctcgttctacgataccggttctccaagaaatctgaggcgggcaacagccgggtgacacctg  
ccagttctgacccccggttctggtatcacctgcccgaactgaccgatcagaccgctgtaacaagaacatgtgaaagcggcgaagaccgagggcgta  
ttcgtctggcgtaccaacaggcaccctgccggtgagcaacctgaagatcaccgaaatagcgcgacctcaacagcaaggcaagtgcgtattccggttaagtt  
gacgtgggtcgtcaaaaaggcaccctgcagatcggtagccttctgaggctacgatacaaaaccagaccggagccacgctatagcctgtgggaagtgttaag  
agggtcaatacataaagagctgggctgtttctgtttcatcagcagcggtagacatcgtgagcattaccgagaaccgtggcaaccaattgatcagctgagctatga  
aggctggtgactaccgcaatgctggactggcgtgaagaagcgagcaagttcgtgagcctgtggcagatcaccaagaaaaacaagaaaaggaatcgtgacc  
gtgaaagcgaagagaagttgacgctgctcaagtaccgaccgctgtataaaitcaa caaggagtacgctatctgctgctgattgtctggtgcaaaagcc  
tgggtgaaactgcaacagattcgtcaagagatcttctgttcttattgaacaggactcgggtgttaccgctctggcagcctgagcctgagcaccctggaacacctgaaagc  
ggtaagggtatcattacagctatcttagcaccgctgaaacgagcaagaacaacccgatcagcgacgaacagcgtaaagattgatccggaactgttcgctg  
gctggaagactgagctgattcgtaccgtaaaaagaacaacaaagtgaacgtatcgcgaacagcctgattcagacctgctgggagaacaacatcaagttcatt  
cgtggtgaaggcgacctgagcaccaccaacaacgagcaagaagaaaggcgaacagccgtagcatggattggtggcgtggtgttttaacaaaatccgtcaa  
ctggcggcgtgcaacaattaccctgttgggtgaggcagcctgtacaccagccaccaggaccgctggtgcatcgttaaccgggataaagcgtgaaagtgcggtg  
ggcggcgtaccggtaaggacattggcgtattgggtgctgctgaagctgagccaaaacctgctgcaaaaacatcggcaccggcgagctactatcaccaagggtt  
aaagagttctgagccattatgaactgcagaccctggaggaaagagctgctgaagtggtgtagcgtatgtaaaagcaacatccgtgctgggtgctgagaacctgt  
ggcgggagaagctgggcaacaagaagcgggtggttacctccgggtcgtggtggccgtatcttttgcgaccacaaggtggcagccgggtgagcagctgtttc  
gacaaaaacaagtggtggttcaacgctgacatgttgcggcggcaacatcgcgctgaccgtgaagggtattggcgaacaaagcagcgaagagaacc  
cggatgtagccgtatcaaacctgcagctgaccagctataaaagcttggctcattagtagggacaatgattcagaaagtagaaattgcggcccaacgacccggtt  
gccattgaaactgactcgaaggcaaatgtctgatgtaactcgtttacaacataacctctgtgtaaaatattactcagttgcaaaaacctcttcttattgacggtg  
cccgtactacccccgactgagaatcaacaacctgctacaatgcagactgactttgacaatttagtgcaatgcctaagaaatccgtcttcttattgacgggtcatgg  
tctcctcttcttattgacggcagtggtggaatagcggccctaaagaaatccgtcttcttattgacggcattcggcgtcgaataggaatccgtcttcttattgacggtatctc  
atggtcctcctgtgtgcaacacctaagaaatccgtcttcttattgacgggagccagccaaaaggcgtggtggtgctgcccgggtgcaacacctaagaaatccgtc  
ttcttattgacgggggaaactggcaacgctgactccagcaacacctaagaaatccgtcttcttattgacgggctgcccctctggccgtgcaacacctaagaaatcc  
gtcttcttattgacgggtgctcagcgggaacaacaggtatcgtggaggccagcaacacctaagaaatccgtcttcttattgacgggtcagccagccagcaacac  
ctaagaaatccgtcttcttattgacgggtgctcccctctggccgttgaacacctaagaaatccgtcttcttattgacgggtcagggattggaactggcgaagaaatccgtct  
ttcttattgacgggtcgtagcgcgcaaaaagcgttgaacacctaagaaatccgtcttcttattgacgggtcagggattggaactggcgaagaaatccgtct  
atatgaggagctcaaacctgagctgtaacaaagcccgaaggagctgagttggtgctgcccaccgctgagcaataactagcataaccccttgggctctaaac  
gggtcttgggggtttttgctgaaaggaggaaactatccgg

|                                            |                                                                                                                                                                |
|--------------------------------------------|----------------------------------------------------------------------------------------------------------------------------------------------------------------|
| T7_Ca<br>s12i2_<br>guide_<br>nontarg<br>et | gaaattaatac gactcactataggttgcaaaacccaagaaatccgtctttcattgacgggtgattgcgcctgagcgagacgaaatacgcggttgcaaaacccaagaa<br>atccgtctttcattgacggctaaccctctctaaacggaggggttt  |
| T7_Ca<br>s12i2_<br>guide_t<br>arget1       | gaaattaatac gactcactataggttgcaaaacccaagaaatccgtctttcattgacggtaaggtgtttacgacagacgataacagggttgcaaaacccaagaaat<br>ccgtctttcattgacggctaaccctctctaaacggaggggttt     |
| T7_Ca<br>s12i2_<br>guide_t<br>arget2       | gaaattaatac gactcactataggttgcaaaacccaagaaatccgtctttcattgacggagtgttcgccaagtaccgagccacatcaagttgcaaaacccaagaa<br>tccgtctttcattgacggctaaccctctctaaacggaggggttt     |
| T7_Ca<br>s12i2_<br>guide_t<br>arget3       | gaaattaatac gactcactataggttgcaaaacccaagaaatccgtctttcattgacggccaagtaccgagccacatcaaggatttctgttgcaaaacccaagaa<br>tccgtctttcattgacggctaaccctctctaaacggaggggttt     |
| T7_Ca<br>s12i2_<br>guide_t<br>arget4       | gaaattaatac gactcactataggttgcaaaacccaagaaatccgtctttcattgacggttaagagcgccatgccggaaggtataccggttgcaaaacccaagaa<br>tccgtctttcattgacggctaaccctctctaaacggaggggttt     |
| T7_Ca<br>s12i2_<br>guide_t<br>arget5       | gaaattaatac gactcactataggttgcaaaacccaagaaatccgtctttcattgacgggaaggcgacggcgtgtacaagacgctgctagttgcaaaacccaaga<br>aatccgtctttcattgacggctaaccctctctaaacggaggggttt   |
| T7_Ca<br>s12i2_<br>guide_t<br>arget6       | gaaattaatac gactcactataggttgcaaaacccaagaaatccgtctttcattgacgggtatctacaatcgtgtcgcgctgactggtgaggttgcaaaacccaagaaat<br>ccgtctttcattgacggctaaccctctctaaacggaggggttt |
| T7_Ca<br>s12i2_<br>guide_t<br>arget7       | gaaattaatac gactcactataggttgcaaaacccaagaaatccgtctttcattgacgggtcgtgaagaacgttcattccaatgcccgcttgcaaaacccaagaaat<br>ccgtctttcattgacggctaaccctctctaaacggaggggttt    |

|                                       |                                                                                                                                                               |
|---------------------------------------|---------------------------------------------------------------------------------------------------------------------------------------------------------------|
| T7_Ca<br>s12i2_<br>guide_t<br>arget8  | gaaattaatac gactcactataggttgcaaaacccaagaaatccgtctttcattgacggcaatgccgccaagcattctgtatattctgctgtgcaaaacccaagaaatc<br>cgctcttcattgacggctaaccctctctaaacggaggggttt  |
| T7_Ca<br>s12i2_<br>guide_t<br>arget9  | gaaattaatac gactcactataggttgcaaaacccaagaaatccgtctttcattgacgggcctgacaccgttaacaatggcatccgctgttgcaaaacccaagaaatc<br>ccgctcttcattgacggctaaccctctctaaacggaggggttt  |
| T7_Ca<br>s12i2_<br>guide_t<br>arget10 | gaaattaatac gactcactataggttgcaaaacccaagaaatccgtctttcattgacgggaaccaggcgtacgatattgaagggtgaccgggtgcaaaacccaagaa<br>atccgctcttcattgacggctaaccctctctaaacggaggggttt |
| T7_Ca<br>s12i2_<br>guide_t<br>arget11 | gaaattaatac gactcactataggttgcaaaacccaagaaatccgtctttcattgacgggaaccctgtatcgtctgctgtaaaacaacctgttgcaaaacccaagaaatc<br>cgctcttcattgacggctaaccctctctaaacggaggggttt |
| T7_Ca<br>s12i2_<br>guide_t<br>arget12 | gaaattaatac gactcactataggttgcaaaacccaagaaatccgtctttcattgacgggcaaacagtttgacacctccgctcaatgccggttgcaaaacccaagaaatc<br>cgctcttcattgacggctaaccctctctaaacggaggggttt |
| T7_Ca<br>s12i2_<br>guide_t<br>arget13 | gaaattaatac gactcactataggttgcaaaacccaagaaatccgtctttcattgacgggatacctcgacgtgcctccagttcggtaggttgcaaaacccaagaaatc<br>cgctcttcattgacggctaaccctctctaaacggaggggttt   |
| T7_Ca<br>s12i2_<br>guide_t<br>arget14 | gaaattaatac gactcactataggttgcaaaacccaagaaatccgtctttcattgacgggctttaatggtaaccgtggctgctcaccgggttgcaaaacccaagaaatc<br>ccgctcttcattgacggctaaccctctctaaacggaggggttt |
| T7_Ca<br>s12i2_<br>guide_t<br>arget15 | gaaattaatac gactcactataggttgcaaaacccaagaaatccgtctttcattgacgggaagctgatggtagcctctgggtataacctgttgcaaaacccaagaaatc<br>ccgctcttcattgacggctaaccctctctaaacggaggggttt |
| T7_Ca<br>s12i2_<br>guide_t<br>arget16 | gaaattaatac gactcactataggttgcaaaacccaagaaatccgtctttcattgacgggtaggtaacctagcagcgtctgtacacgggttgcaaaacccaagaaatc<br>tccgctcttcattgacggctaaccctctctaaacggaggggttt |

|                                       |                                                                                                                                                                                                                                                                                                                                                                                                                                                                                                                                                                                                                                                                                                                                                                                                                                                                                                                                                                                                                                                                                                                                                                                                                                                                                                                                                                                                                                                                                                                                                                                                                                                                                                                                                                                                                                                                                                                               |
|---------------------------------------|-------------------------------------------------------------------------------------------------------------------------------------------------------------------------------------------------------------------------------------------------------------------------------------------------------------------------------------------------------------------------------------------------------------------------------------------------------------------------------------------------------------------------------------------------------------------------------------------------------------------------------------------------------------------------------------------------------------------------------------------------------------------------------------------------------------------------------------------------------------------------------------------------------------------------------------------------------------------------------------------------------------------------------------------------------------------------------------------------------------------------------------------------------------------------------------------------------------------------------------------------------------------------------------------------------------------------------------------------------------------------------------------------------------------------------------------------------------------------------------------------------------------------------------------------------------------------------------------------------------------------------------------------------------------------------------------------------------------------------------------------------------------------------------------------------------------------------------------------------------------------------------------------------------------------------|
| guide_t<br>arget16                    |                                                                                                                                                                                                                                                                                                                                                                                                                                                                                                                                                                                                                                                                                                                                                                                                                                                                                                                                                                                                                                                                                                                                                                                                                                                                                                                                                                                                                                                                                                                                                                                                                                                                                                                                                                                                                                                                                                                               |
| T7_Ca<br>s12i2_<br>guide_t<br>arget17 | gaaattaatacgcactactataggttgcaaaacccaagaaatccgtctttcattgacgggtaccagtcagcgtgacacgattgtagataggttgcaaaacccaagaaa<br>tccgtctttcattgacgggctaaccctctctaaacggaggggttt                                                                                                                                                                                                                                                                                                                                                                                                                                                                                                                                                                                                                                                                                                                                                                                                                                                                                                                                                                                                                                                                                                                                                                                                                                                                                                                                                                                                                                                                                                                                                                                                                                                                                                                                                                 |
| T7_Ca<br>s12i2_<br>guide_t<br>arget18 | gaaattaatacgcactactataggttgcaaaacccaagaaatccgtctttcattgacgggtaaagtctcaccagtcagcgtgacacgatgttgcaaaacccaagaaat<br>ccgtctttcattgacgggctaaccctctctaaacggaggggttt                                                                                                                                                                                                                                                                                                                                                                                                                                                                                                                                                                                                                                                                                                                                                                                                                                                                                                                                                                                                                                                                                                                                                                                                                                                                                                                                                                                                                                                                                                                                                                                                                                                                                                                                                                  |
| T7_Ca<br>s12i2_<br>guide_t<br>arget19 | gaaattaatacgcactactataggttgcaaaacccaagaaatccgtctttcattgacgggtacgcagaatgtgaccgtcttctaaagtttgcaaaacccaagaaatc<br>cgtctttcattgacgggctaaccctctctaaacggaggggttt                                                                                                                                                                                                                                                                                                                                                                                                                                                                                                                                                                                                                                                                                                                                                                                                                                                                                                                                                                                                                                                                                                                                                                                                                                                                                                                                                                                                                                                                                                                                                                                                                                                                                                                                                                    |
| T7_Ca<br>s12i2_<br>guide_t<br>arget20 | gaaattaatacgcactactataggttgcaaaacccaagaaatccgtctttcattgacggggtcacacctcaatatcgtacgcctggttggttgcaaaacccaagaaatc<br>cgtctttcattgacgggctaaccctctctaaacggaggggttt                                                                                                                                                                                                                                                                                                                                                                                                                                                                                                                                                                                                                                                                                                                                                                                                                                                                                                                                                                                                                                                                                                                                                                                                                                                                                                                                                                                                                                                                                                                                                                                                                                                                                                                                                                  |
| T7_Sp<br>Cas9_<br>Effector<br>_wt     | cccgcgaaattaatacgcactactataggggaattgtgagcgggataacaattccctctagaataatgttttaactttaagaaggagattaaatgaaatcgaag<br>aaggtaaaggtcaccatcaccatcaccacggatccatgataagaataactcaataggcttagatatacggcacaatagcgtcggatgggaggatgactgatgat<br>tataaggtccgtctaaaagtcaaggtctgggaatacagaccgccacagatcaaaaaaatctataggggtctttttattgacagtggagagacagcgggaag<br>cgactcgtctcaaacggacagctcgtagaaggatacacgctcgaagaatcgtattgttctcagggagatttttcaaagatagtggaagtagatgatttctt<br>tcatcgactgaagagtctttttggtggaagaagacaagaagcatgaacgctacctatgtttggaatatagtagatgaagttcctatcagaaatcaactatct<br>atcatctgcgaaaaaattggcagattctactgataaagcggatttgccttaactatgttgccttagcgcataatgattaagttcgtggtcatttttgattgaggagattta<br>aatcctgataatgtagtgtagcaaaactattatccagttggtacaaactcaatcaattttgaagaaaacctattaacgcaagtagatgataagcgaatt<br>cttttgcacgattgagtaaatcaagacgattgaaatctcattgctcagctccccgggtgagaagaaaaatggctatttgggaatctcattgcttttattgggattgacc<br>cctaattttaaatcaaatgttattggcagaagatgctaaattacagcttcaaaagatactcagatgatttagataattatggcgcaaatggagatcaaatgctg<br>attgttttggcagctaaagaattatcagatgctattttactttcagatatacctaagagtaaatagtgaaataactaaggctcccctatcagctcaatgattaaacgctacga<br>tgaacatcatcaagactgactcttttaaaagcttttagtcgacaacaactccagaaaagtataaagaatctttttgatcaatcaaaaaacggatgacgggtatattg<br>atgggggagctagccaagaagaatttataaattatcaaaccaatttagaaaaatggatggfactgaggaattattggcgaactaaatcgtgaagatttgcgctg<br>aagcaacggaccttgacaacggctctatccccatcaaatcacttgggtgagctgcatgctattttgagaagacaagaagacttttaccatttttaaaagacaatcgtg<br>agaagattgaaaaatcttgactttcgaatccttattatgttggtcattggcgcgtggcaatagcgttttgatggatgactcgggaagctgaagaaacaattaccca<br>tggaattttgaagaagttgctgataaaggctcagctcaatcattttgaacgcatgacaactttgataaaaaatcttcaaatgaaaaagtactacaaaacatagtt<br>tgcttatgagttttacgggttataacgaattgacaaaggctcaaatatgttactgagggaaatcgcaaaaccagcattcttccaggtgaacagaagaagccattgtga<br>ttactctcaaaacaatcgaaaagtaaccgttaagcaattaaaagaagattttcaaaaaatagaatgtttgtagtggtgaaattcaggcgtgaagatcggttta |

|                                                          |                                                                                                                                                                                                                                                                                                                                                                                                                                                                                                                                                                                                                                                                                                                                                                                                                                                                                                                                                                                                                                                                                                                                                                                                                                                                                                                                                                                                                                                                                                                                                                                                                                                                                                                                                                                                                                                                                                                                                                                                                                                                                                                                                                                                                                                                                                                                                                                                                                                                                                                                                                                                               |
|----------------------------------------------------------|---------------------------------------------------------------------------------------------------------------------------------------------------------------------------------------------------------------------------------------------------------------------------------------------------------------------------------------------------------------------------------------------------------------------------------------------------------------------------------------------------------------------------------------------------------------------------------------------------------------------------------------------------------------------------------------------------------------------------------------------------------------------------------------------------------------------------------------------------------------------------------------------------------------------------------------------------------------------------------------------------------------------------------------------------------------------------------------------------------------------------------------------------------------------------------------------------------------------------------------------------------------------------------------------------------------------------------------------------------------------------------------------------------------------------------------------------------------------------------------------------------------------------------------------------------------------------------------------------------------------------------------------------------------------------------------------------------------------------------------------------------------------------------------------------------------------------------------------------------------------------------------------------------------------------------------------------------------------------------------------------------------------------------------------------------------------------------------------------------------------------------------------------------------------------------------------------------------------------------------------------------------------------------------------------------------------------------------------------------------------------------------------------------------------------------------------------------------------------------------------------------------------------------------------------------------------------------------------------------------|
|                                                          | <p>atgctgattaggtacctacatgattgctaaaaattatcaaagataaagatttttggataatgaagaaaatgaagatatttagaggatattgttttaacattgaccttatt<br/> gaagataaggaaatgattgaggaacgacttaaaagtatgctcacctcttgatgataaggtgatgaaacagcttaaacgtcgccgttatactggtggggcgtgtgtct<br/> cgaaaattgattaatggtattaggataagcaatctggcaaaacaatattagatttttgaatcagatggtttgccaatcgcaatttatgcagctgatccatgatgatgt<br/> ttgacatttaaagaagatattcaaaaagcacaagtgtctggacaagggcagatgtttacatgaacatattgcaaattagctgtagccctgctataaaaaggattttac<br/> agactgtaaaagttgtgatgaattggtcaaagtaatggggcgcataagccagaaaatcgttattgaaatggcacgtgaaaaatcagacaactcaaaaggcca<br/> gaaaaattcgctgtagcgtatgaaacgtattgaagaaggaataaaagaactaggaagtgatattctaaaggagatcctgttgaaaacactcaattcaaaaatgaaa<br/> agctctatctctattatctcaaaaatggaagagacatgtatgtggaccaagaattagatattaactgtttaagtgattatgatgcatcacattgtccacaaagttccttaa<br/> agacgattcaatagacaataagggttaacgcgttctgataaaaaatcggtgaaatcgataacgttccaagtgaagaagtagtcaaaaagatgaaaaactattgga<br/> aacaactctaaacgccaagtaatacactcaacgtaagtttgataaatacaaaaactgaaacgtggagggttgagtgaactgataaaagctggtttatcaaacgccaat<br/> tggtgaaactcgcaaatcactaagcatgtggcacaatatttggatgctgcatgaaactaaatcgatgaaaatgataaacttattcgagagggttagagtgattacct<br/> taaatctaaattagttctgactccgaaaagattccaattctataaagtagctgagattaacaattaccatcatgccatgatcgctatctaatgccgtcgttgaactg<br/> cttgattaagaaatctcaaaactgaaatcgagttgtctatggtgattataaagttatgatgttcgtaaaatgattgtaagctgagcaggaaataggcaagcaac<br/> cgcaaaaatttcttactctaatatcatgaactctcaaaacagaaattacacttgcaaatggagagattcgcaaacgccctctaactgaaactaatgggaaactgg<br/> agaaattgtctgggataaaagggcagattttgccacagtcgcaaaagtattgctcagcccaagtcaatattgtcaagaaaacagaagtagacagacaggcggattctc<br/> caaggagcaattttcaaaaaagaaatcggaacagcttattgctgtaaaaaagactgggatcaaaaaatattggtggtttgatagccaacggtagcttattcag<br/> tcctagtgttctgaagtggaaggggaaatcgaaagttaaaaatccgttaaaagagttactagggatcacaattatgaaagaagttcctttgaaaaaatccga<br/> ttgacttttagaagctaaaggatataaggaagttgaaaagactaatcattaaactacctaataatagctttttgagttgaaaacggtcgtaaacggatgctggctag<br/> tgccggagaattacaaaaaggaatgagctgctcgaacgaaatattgtaaatttttatatttagctagcattatgaaaagttgaagggtagtccaagaagataacg<br/> aacaaaaacaattglttgaggcagcagataagcattatttagatgagattatgagcaaatcagtgaaatttctaagcgtgttatttagcagatgccaatttagataaagttc<br/> ttagtcatatacaaacatagagacaaaccaatcgtgaacaagcagaaaaatattattcattttacgttgacgaatctggagctcccgtcttttaaatattttgat<br/> acaacaattgatcgtaaacgatatacgtctacaaaagaagttttagatgccactcttatccatcaatccatcactggtcttatgaaacacgcattgattgagtcagctag<br/> gaggtagtaataaaaagcccgaaaggaagctgagttggctgctgccaccgctgagcaataactagcataacccttggggcctctaaacgggtcttgaggggtttt<br/> tgctgaaaggaggaactatatccgg</p> |
| <p>T7_Sp<br/> Cas9_g<br/> uide_n<br/> ontarge<br/> t</p> | <p>gaaattaatacagctcactataggggtgattgctcctgagcagagatttttagagctagaaatagcaagttaaaataaggctagccgttatcaactgaaaaagtgcca<br/> ccgagtcggtgcttttaaccctctctaaacggaggggttt</p>                                                                                                                                                                                                                                                                                                                                                                                                                                                                                                                                                                                                                                                                                                                                                                                                                                                                                                                                                                                                                                                                                                                                                                                                                                                                                                                                                                                                                                                                                                                                                                                                                                                                                                                                                                                                                                                                                                                                                                                                                                                                                                                                                                                                                                                                                                                                                                                                                                             |
| <p>T7_Sp<br/> Cas9_g<br/> uide_ta<br/> rget1</p>         | <p>gaaattaatacagctcactataggggaaactggaagggcagctgagtttttagagctagaaatagcaagttaaaataaggctagccgttatcaactgaaaaagtggc<br/> accgagtcggtgcttttaaccctctctaaacggaggggttt</p>                                                                                                                                                                                                                                                                                                                                                                                                                                                                                                                                                                                                                                                                                                                                                                                                                                                                                                                                                                                                                                                                                                                                                                                                                                                                                                                                                                                                                                                                                                                                                                                                                                                                                                                                                                                                                                                                                                                                                                                                                                                                                                                                                                                                                                                                                                                                                                                                                                             |
| <p>T7_Sp<br/> Cas9_g</p>                                 | <p>gaaattaatacagctcactatagggcaagtaccgagccacatcagtttttagagctagaaatagcaagttaaaataaggctagccgttatcaactgaaaaagtggc<br/> accgagtcggtgcttttaaccctctctaaacggaggggttt</p>                                                                                                                                                                                                                                                                                                                                                                                                                                                                                                                                                                                                                                                                                                                                                                                                                                                                                                                                                                                                                                                                                                                                                                                                                                                                                                                                                                                                                                                                                                                                                                                                                                                                                                                                                                                                                                                                                                                                                                                                                                                                                                                                                                                                                                                                                                                                                                                                                                              |

|                                      |                                                                                                                                                          |
|--------------------------------------|----------------------------------------------------------------------------------------------------------------------------------------------------------|
| uide_ta<br>rget2                     |                                                                                                                                                          |
| T7_Sp<br>Cas9_g<br>uide_ta<br>rget3  | gaaattaatacgcactcactatagggcgtgtacaagcgcgctagtttagagctagaaatagcaagttaaaataaggctagccggtatcaactgaaaaagtgcca<br>ccgagtcggtgcttttaaccctctctaaacggaggggttt     |
| T7_Sp<br>Cas9_g<br>uide_ta<br>rget4  | gaaattaatacgcactcactatagggctgcctgacaccgtaacaagtttagagctagaaatagcaagttaaaataaggctagccggtatcaactgaaaaagtgcca<br>ccgagtcggtgcttttaaccctctctaaacggaggggttt   |
| T7_Sp<br>Cas9_g<br>uide_ta<br>rget5  | gaaattaatacgcactcactatagggggaaggtgtaccgaaaaacgtttagagctagaaatagcaagttaaaataaggctagccggtatcaactgaaaaagtgga<br>accgagtcggtgcttttaaccctctctaaacggaggggttt   |
| T7_Sp<br>Cas9_g<br>uide_ta<br>rget6  | gaaattaatacgcactcactatagggacctcctcaatgccgcagtttagagctagaaatagcaagttaaaataaggctagccggtatcaactgaaaaagtgccac<br>cgagtcggtgcttttaaccctctctaaacggaggggttt     |
| T7_Sp<br>Cas9_g<br>uide_ta<br>rget7  | gaaattaatacgcactcactatagggctctaaagaaatcctgtagtttagagctagaaatagcaagttaaaataaggctagccggtatcaactgaaaaagtgccac<br>cgagtcggtgcttttaaccctctctaaacggaggggttt    |
| T7_Sp<br>Cas9_g<br>uide_ta<br>rget8  | gaaattaatacgcactcactataggggccgtcctcgaagctgagtttagagctagaaatagcaagttaaaataaggctagccggtatcaactgaaaaagtgcca<br>ccgagtcggtgcttttaaccctctctaaacggaggggttt     |
| T7_Sp<br>Cas9_g<br>uide_ta<br>rget9  | gaaattaatacgcactcactatagggggcagaatatacagaatgctgttttagagctagaaatagcaagttaaaataaggctagccggtatcaactgaaaaagtgga<br>accgagtcggtgcttttaaccctctctaaacggaggggttt |
| T7_Sp<br>Cas9_g<br>uide_ta<br>rget10 | gaaattaatacgcactcactatagggcacctcaatatcgtagccgttttagagctagaaatagcaagttaaaataaggctagccggtatcaactgaaaaagtgccac<br>cgagtcggtgcttttaaccctctctaaacggaggggttt   |

|                                   |                                               |
|-----------------------------------|-----------------------------------------------|
| T7_for<br>ward_p<br>rimer         | cccgcgaaattaatacgactcactataggg                |
| T7term<br>_revers<br>e_prim<br>er | caaaaaaccctcaagaccgtttagaggccccaaggggttagctag |

119

120

121

122 **Supplementary Table 3. A list of DNA sequences used in transient transfection**  
 123 **screens and validation in HEK293T cells**

| Name                   | Format       | PAM  | Spacer                |
|------------------------|--------------|------|-----------------------|
| Cas12i2_AAVS1_T1       | Plasmid      | CTTT | TGTCCCCCAAGTTTGGAC    |
| Cas12i2_AAVS1_T2       | Plasmid      | CTTT | GTGAGAATGGTGCCTCCTAG  |
| Cas12i2_AAVS1_T3       | Plasmid      | CTTT | AACTGGCCCTGGCTTTGGCA  |
| Cas12i2_AAVS1_T4       | Plasmid      | CTTT | GTAGCCTCTCCCGCTTGGT   |
| Cas12i2_AAVS1_T5       | Plasmid      | CTTT | GGGAAGTGGTTGGTCAGCAT  |
| Cas12i2_AAVS1_T6       | Plasmid      | CTTT | AGCGGGTATGGGAAGGGCTT  |
| Cas12i2_EMX1_T1        | Plasmid      | CTTT | GGGCGCAGGGCCACCTGGAC  |
| Cas12i2_EMX1_T2        | Plasmid      | CTTT | GGATGGCGACTTCAGGCACA  |
| Cas12i2_EMX1_T3        | Plasmid      | CTTT | GGGGAGGCCTGGAGTCATGG  |
| Cas12i2_EMX1_T4        | Plasmid      | CTTT | GAGCCAGTGTGCTAGTCAA   |
| Cas12i2_EMX1_T5        | Plasmid      | CTTT | AGCAAGGGACTATTCAGGGA  |
| Cas12i2_EMX1_T6        | Plasmid      | CTTT | AAAATTGAGCAATCTACCCT  |
| Cas12i2_VEGFA_T1       | Plasmid      | CTTT | TGGGGGTGACCGCCGGAGCG  |
| Cas12i2_VEGFA_T2       | Plasmid      | CTTT | AATCCTCCACCAGTCATGGT  |
| Cas12i2_VEGFA_T3       | Plasmid      | CTTT | GTTGACATTGTCCACACCTG  |
| Cas12i2_VEGFA_T4       | Plasmid      | CTTT | TTAAACTCTCCATGGACCAG  |
| Cas12i2_VEGFA_T5       | Plasmid      | CTTT | GCCCATACTGGGGACCAAGG  |
| Cas12i2_VEGFA_T6       | Plasmid      | CTTT | GCCGTAACCCCTTCGTGGGTA |
| SpCas9_AAVS1_T1        | Plasmid      | TGG  | GCTTTTGTCCCCCAAGTTT   |
| SpCas9_AAVS1_T2        | Plasmid      | AGG  | TTGTGAGAATGGTGCCTCCT  |
| SpCas9_AAVS1_T3        | Plasmid      | TGG  | GCTTTAACTGGCCCTGGCTT  |
| SpCas9_AAVS1_T4        | Plasmid      | TGG  | CTTTGTAGCCTCTCCCGCTC  |
| SpCas9_AAVS1_T5        | Plasmid      | TGG  | TGGGAAGTGGTTGGTCAGCA  |
| SpCas9_AAVS1_T6        | Plasmid      | GGG  | GACTTTAGCGGGTATGGGAA  |
| SpCas9_EMX1_T1         | Plasmid      | TGG  | TCTTTGGGCGCAGGGCCACC  |
| SpCas9_EMX1_T2         | Plasmid      | AGG  | TGGATGGCGACTTCAGGCAC  |
| SpCas9_EMX1_T3         | Plasmid      | TGG  | TTTGGGGAGGCCTGGAGTCA  |
| SpCas9_EMX1_T4         | Plasmid      | GGG  | GAGCCAGTGTGCTAGTCAA   |
| SpCas9_EMX1_T5         | Plasmid      | GGG  | CTTTAGCAAGGGACTATTCA  |
| SpCas9_EMX1_T6         | Plasmid      | TGG  | TAAAATTGAGCAATCTACC   |
| SpCas9_VEGFA_T1        | Plasmid      | CGG  | TGGGGGTGACCGCCGGAGCG  |
| SpCas9_VEGFA_T2        | Plasmid      | TGG  | CTTTAATCCTCCACCAGTCA  |
| SpCas9_VEGFA_T3        | Plasmid      | TGG  | TTGTTGACATTGTCCACACC  |
| SpCas9_VEGFA_T4        | Plasmid      | AGG  | TTTTAAACTCTCCATGGACC  |
| SpCas9_VEGFA_T5        | Plasmid      | AGG  | TTTGGCCATCTGGGGACCA   |
| SpCas9_VEGFA_T6        | Plasmid      | GGG  | GCTTTGCCGTAACCCCTTCGT |
| Cas12i2_AAVS1_Screen_1 | PCR Amplicon | TTTG | TGAGAATGGTGCCTCCTAGG  |
| Cas12i2_AAVS1_Screen_2 | PCR Amplicon | GTTG | AGCCCTCCAGCCGGTCTCTG  |
| Cas12i2_AAVS1_Screen_3 | PCR Amplicon | CTTG | TGGCCTGGGTACCTCTACG   |
| Cas12i2_AAVS1_Screen_4 | PCR Amplicon | GTTG | GTGGAGTCCAGCACGGCGCG  |
| Cas12i2_AAVS1_Screen_5 | PCR Amplicon | GTTG | GGTGAGGGAGGAGAGATGCC  |
| Cas12i2_AAVS1_Screen_6 | PCR Amplicon | CTTA | TCTGGTGACACACCCCAT    |
| Cas12i2_EMX1_Screen_1  | PCR Amplicon | CTTC | GTGAGTGGCTTCCCTGCCGC  |
| Cas12i2_EMX1_Screen_2  | PCR Amplicon | TTTG | TGGATAAACTTCTCGGAGG   |
| Cas12i2_EMX1_Screen_3  | PCR Amplicon | CTTG | TGTGACCTGTCCCACATCT   |
| Cas12i2_EMX1_Screen_4  | PCR Amplicon | ATTG | TGTGAGGCCTAGTGGGGTG   |
| Cas12i2_EMX1_Screen_5  | PCR Amplicon | ATTG | AGAGGTGGGAATCAGGCCCA  |
| Cas12i2_EMX1_Screen_6  | PCR Amplicon | GTTC | TCTTGAGATGGGCTCGGGCT  |
| Cas12i2_VEGFA_Screen_1 | PCR Amplicon | GTTG | GTGCCCTTCGGTCTCCGGCA  |
| Cas12i2_VEGFA_Screen_2 | PCR Amplicon | ATTC | TGTGCCCGTGGGACCCCGG   |
| Cas12i2_VEGFA_Screen_3 | PCR Amplicon | GTTG | GTGCCCTGCTGTCTAATG    |
| Cas12i2_VEGFA_Screen_4 | PCR Amplicon | TTTC | GGAGGCCCGACCGGGGCCGG  |
| Cas12i2_VEGFA_Screen_5 | PCR Amplicon | CTTG | TGAGTGCTCCGTGTTAAGGG  |
| Cas12i2_VEGFA_Screen_6 | PCR Amplicon | TTTC | TCCGCTCTGAGCAAGGCCCA  |
| SpCas9_AAVS1_Screen_1  | PCR Amplicon | AGG  | TTGTGAGAATGGTGCCTCCT  |
| SpCas9_AAVS1_Screen_2  | PCR Amplicon | TGG  | TGAGCCCTCCAGCCGGTCC   |
| SpCas9_AAVS1_Screen_3  | PCR Amplicon | CGG  | TGTGGCCTGGGTACCTCTA   |
| SpCas9_AAVS1_Screen_4  | PCR Amplicon | CGG  | TGGTGGAGTCCAGCACGGCG  |



|                       |              |     |                      |
|-----------------------|--------------|-----|----------------------|
| SpCas9_AAVS1_Screen_5 | PCR Amplicon | CGG | GGTGAGGGAGGAGAGATGCC |
| SpCas9_AAVS1_Screen_6 | PCR Amplicon | TGG | GGTGACACACCCCCATTTC  |
| SpCas9_EMX1_Screen_1  | PCR Amplicon | CGG | CGTGAGTGGCTTCCCTGCCG |
| SpCas9_EMX1_Screen_2  | PCR Amplicon | AGG | TTGTGGATAAAACTTCTCGG |
| SpCas9_EMX1_Screen_3  | PCR Amplicon | TGG | GTGTGACCTGTTCCACATC  |
| SpCas9_EMX1_Screen_4  | PCR Amplicon | TGG | GAGATTGTGTGAGGGCCTAG |
| SpCas9_EMX1_Screen_5  | PCR Amplicon | AGG | CGTATTGAGAGGTGGGAATC |
| SpCas9_EMX1_Screen_6  | PCR Amplicon | CGG | GTGTTCTCTTGAGATGGGCT |
| SpCas9_VEGFA_Screen_1 | PCR Amplicon | CGG | GGTTGGTGCCCTTCGGTCCT |
| SpCas9_VEGFA_Screen_2 | PCR Amplicon | CGG | TCTGTGCCCGTGGGGACCCC |
| SpCas9_VEGFA_Screen_3 | PCR Amplicon | TGG | CCCGCTGCTGTCTAATGCC  |
| SpCas9_VEGFA_Screen_4 | PCR Amplicon | CGG | TTCGGAGGCCCGACCGGGGC |
| SpCas9_VEGFA_Screen_5 | PCR Amplicon | AGG | CTTGTGAGTGCTCCGTGTTA |
| SpCas9_VEGFA_Screen_6 | PCR Amplicon | AGG | TGCTTTCTCCGCTCTGAGCA |

125 **Supplementary Table 4. A list of DNA sequences used in *in vitro* cleavage and**

126 **EMSA**

| Name                           | target                                                                                                                                                         | gRNA                                                                                                                                                                                               |
|--------------------------------|----------------------------------------------------------------------------------------------------------------------------------------------------------------|----------------------------------------------------------------------------------------------------------------------------------------------------------------------------------------------------|
| Cas12i2 Target                 | TCCATGTCTCGTTATACGCTGTGGTTCGCCAACGCACG<br>AGTGTACTACTAACGCTGCGTCAGCTTTGGCGTCAACA<br>TGGGTGACTATCACCTGAATCATCAGCAACTACTCGAG<br>TGTTTGACAGCTAGCTCAGTCCTAGGTATAAT | GTTGCAAAACCCAAGAAATCCGTCTTTC<br>ATTGACGGGGAGCGCAGTCACCAAAAC<br>TTGTCCTTTCAGGTTGCAAAACCCAAGA<br>AATCCGTCTTTCATTGACGGAGGTGATA<br>GTCACCCATGTTGACGCCAAAGCGTTG<br>CAAAACCCAAGAAATCCGTCTTTCATTG<br>ACGG |
| Cas12i2 Non-Target             | TCCATGTCTCGTTATACGCTGTGGTTCGCCAACGCAGA<br>ACCACACTACTAACTGCCAAAGAGTGCCGTTTTGGCTA<br>TCGCGACAGTATTTTTAAACATGAATACACTACTGAACC<br>ACTTGACAGCTAGCTCAGTCCTAGGTATAAT |                                                                                                                                                                                                    |
| cis ssDNA target (Cas12i2)     | GTGGTTCGCCAACATATAGTTCACTACTAGCATGCTGC<br>CCTTGACTAGCAACACTGGCTCAAAGAAGGAAAGACTA<br>CTTATAGTTCTTGACAGCTAGCTC                                                   | AGAAATCCGTCTTTCATTGACGGGAGC<br>CAGTGTTGCTAGTCAA                                                                                                                                                    |
| trans ssDNA target (Cas12i2)   | GCCTGGTCCATGGAGAGTTTAAAAAGTCTTTTGGACTA<br>CTGGAACGACTTGACAGCTAGC                                                                                               |                                                                                                                                                                                                    |
| AAVS target 2 Cut site target  | TCCATGTCTCGTTATACGCTGTGGTTCGCCAACAAACAC<br>TAGTACTACTGATAAATTACCCCCAAGTCCCTCACCTC<br>TCCAAAGCTGCCATACTACTACACTAGTTTGACAGCTA<br>GCTCAGTCCTAGGTATAATGCTAGC       | AGAAATCCGTCTTTCATTGACGGGGAG<br>AGGTGAGGGACTTGGG (Cas12i2)<br>GGAGAGGTGAGGGACTTGGGTTTTAG<br>AGCTAGAAATAGCAAGTTAAAATAAGGC<br>TAGTCCGTTATCAACTTGAAAAAGTGGC<br>ACCGAGTCGGTGC (SpCas9)                  |
| EMX target 6 Cut site target   | TCCATGTCTCGTTATACGCTGTGGTTCGCCAACATATAG<br>TTCACTACTAGCATGCTGCCCTTGACTAGCAACACTGG<br>CTCAAAGAAGGAAAGACTACTTATAGTTCTTGACAGCTA<br>GCTCAGTCCTAGGTATAATGCTAGC      | AGAAATCCGTCTTTCATTGACGGGAGC<br>CAGTGTTGCTAGTCAA (Cas12i2)                                                                                                                                          |
| VEGFA target 5 Cut site target | TCCATGTCTCGTTATACGCTGTGGTTCGCCAACGCAGG<br>AACGACACTACTAGCTGGATGAGCCTGGTCCATGGAGA                                                                               | AGAAATCCGTCTTTCATTGACGGTTAAA<br>CTCTCCATGGACCAG (Cas12i2)                                                                                                                                          |

|                               |                                                                                                                                                                                                                                                                                                                                                                                                                                                                                                                                                                                                                                                                                                                                  |                                                 |
|-------------------------------|----------------------------------------------------------------------------------------------------------------------------------------------------------------------------------------------------------------------------------------------------------------------------------------------------------------------------------------------------------------------------------------------------------------------------------------------------------------------------------------------------------------------------------------------------------------------------------------------------------------------------------------------------------------------------------------------------------------------------------|-------------------------------------------------|
|                               | GTTTAAAAAGTCTTTTGGACTACTGGAACGACTTGACAG<br>CTAGCTCAGTCCTAGGTATAATGCTAGC                                                                                                                                                                                                                                                                                                                                                                                                                                                                                                                                                                                                                                                          |                                                 |
| AAVS1 target 5<br>EMSA target | TTTCTGTCTGCAGCTTGTGGCCTGGGTACACCTCTACGG<br>CTGGCCCAGATCCTTCCCTGCCGCCTCCTTCAGGTTCC<br>GTCTTCTCCACTCCCTCTTCCCCTTGCTCTCTGCTGTG<br>TTGCTGCCCAAGGATGCTCTTCCGGAGCACTTCCTTC<br>TCGGCGCTGCACCACGTGATGTCCTCTGAGCGGATCC<br>TCCCCGTGTCTGGGTCTCTCCGGGCATCTCTCCTCCC<br>TCACCCAACCCCATGCCGTCTTCACTCGCTGGGTTCCC<br>TTTTCTTCTCCTTCTGGGGCCTGTCCATCTCTCGTTT<br>CTTAGGATGGCCTTCTCCGACGGATGTCTCCCTTGCGT<br>CCCGCCTCCCCTTCTTGTAGGCCTGCATCATCACCGTT<br>TTTCTGGACAACCCCAAAGTACCCCGTCTCCCTGGCTT<br>TAGCCACCTCTCCATCCTTGTCTTTCTTGCCTGGACA<br>CCCCGTTCTCCTGTGGATTGGGTACCTCTCACTCCT<br>TTCATTTGGGCAGCTCCCCTACCCCTTACCTCTCTA<br>GTCTGTGCTAGCTCTTCCAGCCCCCTGTCATGGCATCT<br>TCCAGGGTCCGAGAGCTCAGCTAGTCTTCTCCTCCA<br>ACCCGGGCCCTATGTCCACTTCAGGACAGCATGTTTG<br>C | AGAAATCCGTCTTTCATTGACGGGGGA<br>AGTGGTTGGTCAGCAT |
| VEGFA target 2<br>EMSA target | GACCTTAATACTTACCATGGCTTTGGACCAGGGAACATA<br>GGGGGATAGTGAGAGCAGGGAGAGGGAAGTGTGGGG<br>AAGGTACAGGGGACCTCGACAGTGAAGCATTCTGGGG<br>TTTTCTCCTGCATTTGAGCTCCCCAGCCCCAACAT<br>CTGGTTAGTCTTTAACTTCCCTCGGGTTCATAACCATAGC<br>AGTCCAGGAGTGGTGGGCATATTCTGTGCCCGTGGGG<br>ACCCCGGTTGTGTCCTGTTGACTCAGAAGACTTGGA<br>GAAGCCAGAGGCTGTTGGTGGGAGGGAAGTGAGGAG<br>GGAGGAGGGGCTGGGTGGCTGGGCCTGTGCACCCCA<br>GCCCTGCCCATGCCATGCCTTGCTCTCTTTCTGTCC<br>TCAGTGGTCCCAGGCTGCACCCATGGCAGAAGGAGGA<br>GGGCAGAATCATCACGAAGGTGAGTCCCCTGGCTGT<br>TGGATGGGGTCCCTGTCCTCTCAGGGGATGGGTGGA<br>TGGCCTAATTCCTTTTCTTTCAGAACTGTGGGGAGGAA<br>G                                                                                                                                     | AGAAATCCGTCTTTCATTGACGGAATCC<br>TCCACCAGTCATGGT |



**Supplementary Table 5. A list of RNA sequences used in RNP ex vivo editing**

| Name                   | target             | gRNA                                                                                                                                                                                                             |
|------------------------|--------------------|------------------------------------------------------------------------------------------------------------------------------------------------------------------------------------------------------------------|
| ABR-001 B2M 1 crRNA    | B2M                | rArGrArArArUrCrCrGrUrCrUrUrUrCrArUrUrGrArCrGrGrArArUrGrUrCrGrGrArUr<br>GrGrArUrGrArArArCrC                                                                                                                       |
| ABR-001 B2M 2 crRNA    | B2M                | rArGrArArArUrCrCrGrUrCrUrUrUrCrArUrUrGrArCrGrGrCrUrArUrCrUrCrUrUrGr<br>UrArCrUrArCrArCrUrG                                                                                                                       |
| ABR-001 B2M 3 crRNA    | B2M                | rArGrArArArUrCrCrGrUrCrUrUrUrCrArUrUrGrArCrGrGrArCrArCrGrGrCrArGrGr<br>CrArUrArCrUrCrArUrC                                                                                                                       |
| ABR-001 B2M 4 crRNA    | B2M                | rArGrArArArUrCrCrGrUrCrUrUrUrCrArUrUrGrArCrGrGrUrCrArCrArGrCrCrCr<br>ArArGrArUrArGrUrUrA                                                                                                                         |
| ABR-001 TRAC crRNA     | TRAC               | rArGrArArArUrCrCrGrUrCrUrUrUrCrArUrUrGrArCrGrGrArGrArGrUrCrUrCrUrCr<br>ArGrCrUrGrGrUrArCrA                                                                                                                       |
| ABR-001 CIITA crRNA    | CIITA              | rArGrArArArUrCrCrGrUrCrUrUrUrCrArUrUrGrArCrGrGrUrUrArArCrArGrCrGrAr<br>UrGrCrUrGrArCrCrCrC                                                                                                                       |
| ABR-001 BCL11A 1 crRNA | BCL11A<br>enhancer | rArGrArArArUrCrCrGrUrCrUrUrUrCrArUrUrGrArCrGrGrArArGrCrUrArGrUrCr<br>UrArGrUrGrCrArArGrC                                                                                                                         |
| ABR-001 BCL11A 2 crRNA | BCL11A<br>enhancer | rArGrArArArUrCrCrGrUrCrUrUrUrCrArUrUrGrArCrGrGrUrGrGrArGrCrCrUrG<br>rUrGrArUrArArArArGrC                                                                                                                         |
| ABR-001 BCL11A 3 crRNA | BCL11A<br>enhancer | rArGrArArArUrCrCrGrUrCrUrUrUrCrArUrUrGrArCrGrGrUrArCrCrCrArCrCrCr<br>ArCrGrCrCrCrCrCrArC                                                                                                                         |
| SpCas9 BCL11A sgRNA    | BCL11A<br>enhancer | mC*mU*mA*rArCrArGrUrUrGrCrUrUrUrUrArUrCrArCrGrUrUrUrArGrArGrCr<br>UrArGrArArArUrArGrCrArArGrUrUrArArArArUrArArGrGrCrUrArGrUrCrCrGrUrU<br>rArUrCrArArCrUrUrGrArArArArArGrUrGrGrCrArCrCrGrArGrUrCrGmG*mU*mG<br>*rC |

130 **Supplementary Table 6. A list of antibodies used in flow cytometry**

| <b>Antibody</b>         | <b>Clone</b> | <b>Fluorophore</b> | <b>Protein</b>     | <b>Vendor</b> | <b>Catalog #</b> | <b>Dilution</b> |
|-------------------------|--------------|--------------------|--------------------|---------------|------------------|-----------------|
| Anti-human B2M          | 2M2          | PE                 | Human B2M          | BioLegend     | 316305           | 1:20            |
| Anti-human TRAC         | IP26         | APC/Cy7            | Human TRAC         | BioLegend     | 306728           | 1:20            |
| Anti-human HLA-DR/DP/DQ | Tü39         | FITC               | Human HLA-DR/DP/DQ | BioLegend     | 361706           | 1:20            |
| Anti-human CD45         | HI30         | APC                | Human CD45         | BioLegend     | 304012           | 1:20            |
| Anti-mouse CD45         | 30-F11       | BV785              | Mouse CD45         | BioLegend     | 103149           | 1:40            |
| Anti-human CD15         | HI98         | PE                 | Human CD15         | BioLegend     | 301906           | 1:20            |
| Anti-human CD66b        | G10F5        | PE                 | Human CD66b        | BioLegend     | 305106           | 1:20            |
| Anti-human CD19         | HIB19        | BV421              | Human CD19         | BioLegend     | 302234           | 1:20            |
| Anti-human CD20         | 2H7          | BV421              | Human CD20         | BioLegend     | 302330           | 1:20            |
| Anti-human CD71         | CY1G4        | FITC               | Human CD71         | BioLegend     | 334104           | 1:20            |
| Anti-human HbF          | HBF-1        | APC                | Human HbF          | Thermofisher  | MHFH05           | 1:20            |
| Anti-human HbF          | HBF-1        | FITC               | Human HbF          | Thermofisher  | MHFH04           | 1:20            |

Engineered Cas12i2 is a versatile high-efficiency platform for therapeutic genome editing

McGaw, C., et al.

Supplementary Figures

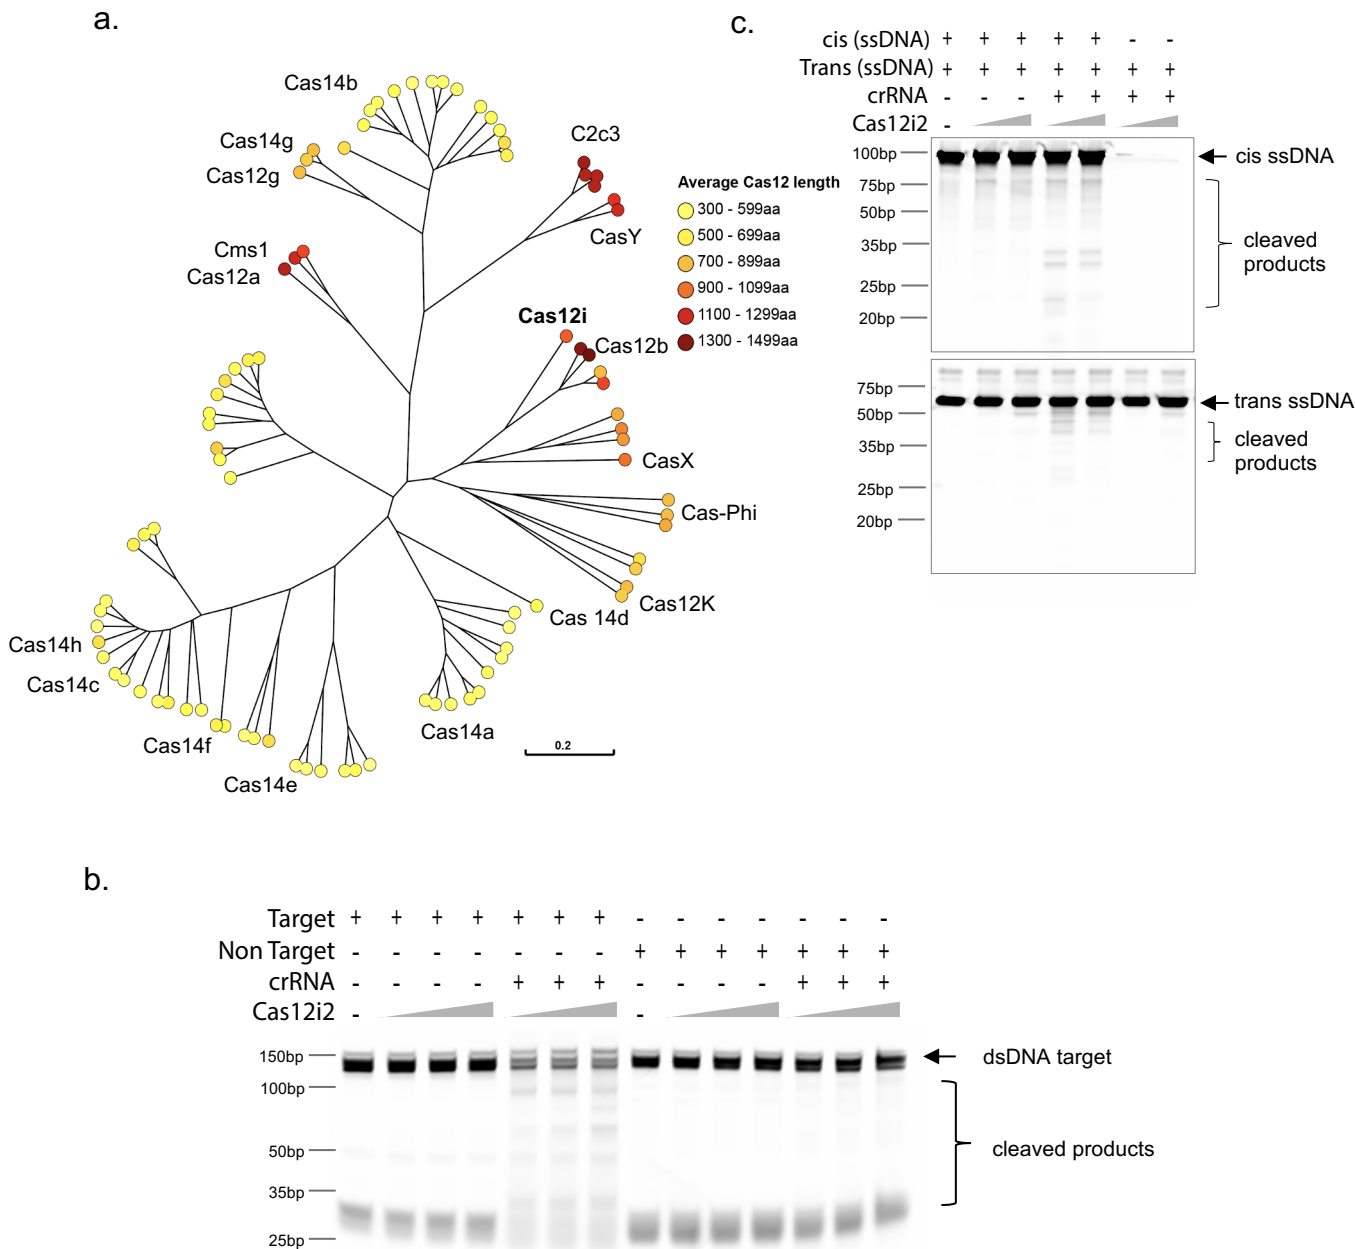

**Supplementary Fig. 1. Type V-I nucleases Cas12i2 exhibited *in vitro* target-dependent dsDNA and ssDNA cleavage.** a. Phylogenetic tree of diverse CRISPR Cas type V systems with Cas12i (bold, subtype V-I) representing an evolutionarily distinct branch. Average Cas12 effector lengths are colored. b. *In vitro* crRNA dependent cleavage of IR-labelled target (with PAM and complementary spacer) and non-target (with PAM and non-complementary spacer) dsDNA by Cas12i2. c. *In vitro* cleavage of cis target (ssDNA target with complementarity to crRNA, top panel) and trans ssDNA (with no complementarity to crRNA, bottom panel). Cis and trans ssDNA are orthogonally fluorescently labelled and visualized separately in respective fluorescence channels. shown are representative images of denaturing urea gels from n=2 experiments. Source Data are provided as a Source Data file.



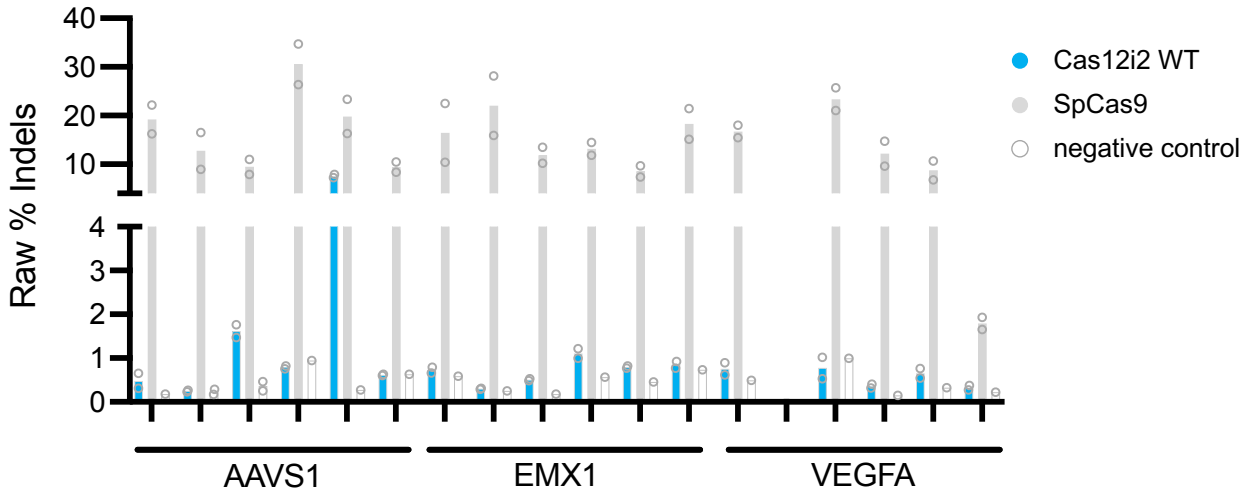

**Supplementary Fig. 2. Indel activity of Cas12i2 and SpCas9 at individual 18 target sites in HEK293T cells.** Each column represents one target site, each dot represent one replicate. Source Data are provided as a Source Data file.

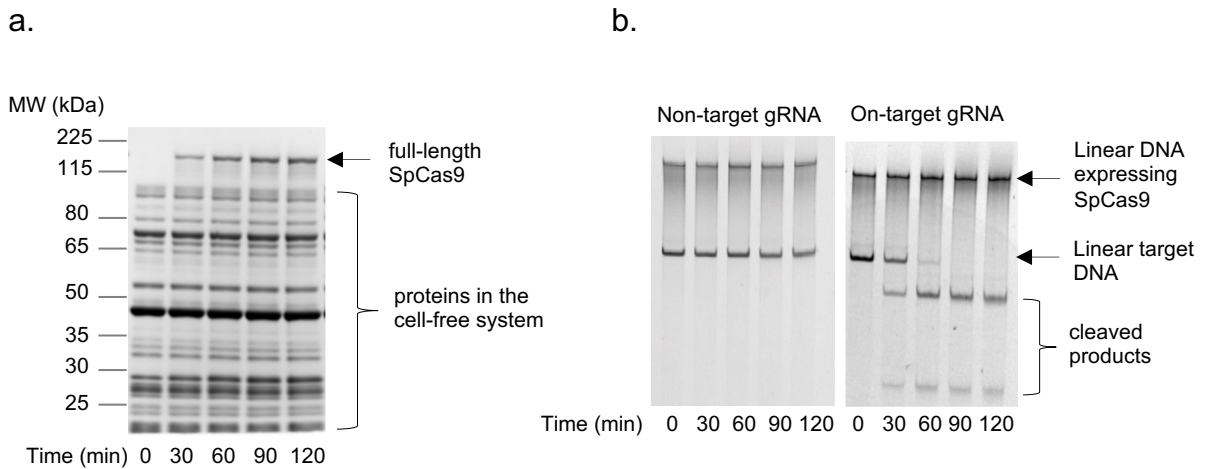

**Supplementary Fig. 3. Cell-free expression and *in vitro* cleavage activity of SpCas9. a.**

Coomassie stained SDS-PAGE gel showing time course of *in vitro* expression of SpCas9 in the reconstituted cell-free protein synthesis system. Gel is from n=1 experiments. . b. *In vitro* cleavage of non-target (left panel) and target (right panel) linear dsDNA by cell-free expressed SpCas9 (from aliquots of reactions in (a)). DNA fragments are resolved on 6% TBE gel. Some carry-over linear DNA expressing SpCas9 and possibly genomic DNA fragments from the cell-free system are visible on the upper part of gel. Shown are representative images of SDS-PAGE gels from n=2 experiments. Source Data are provided as a Source Data file.

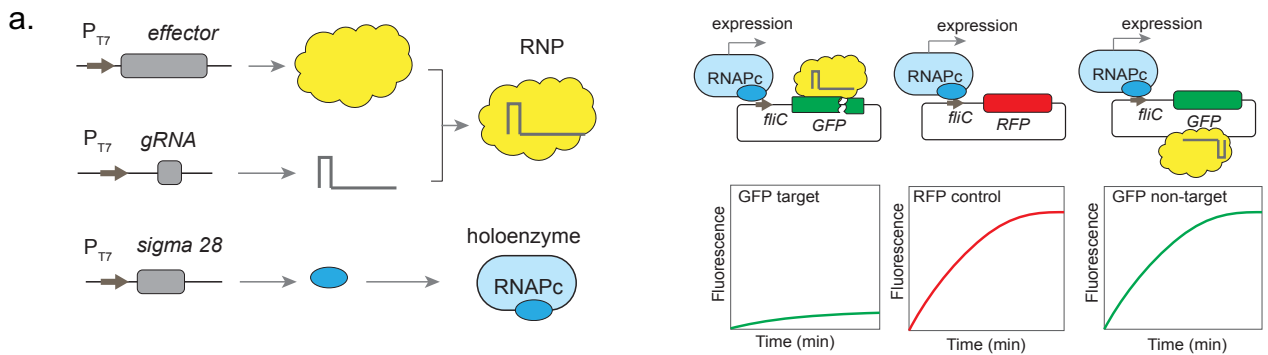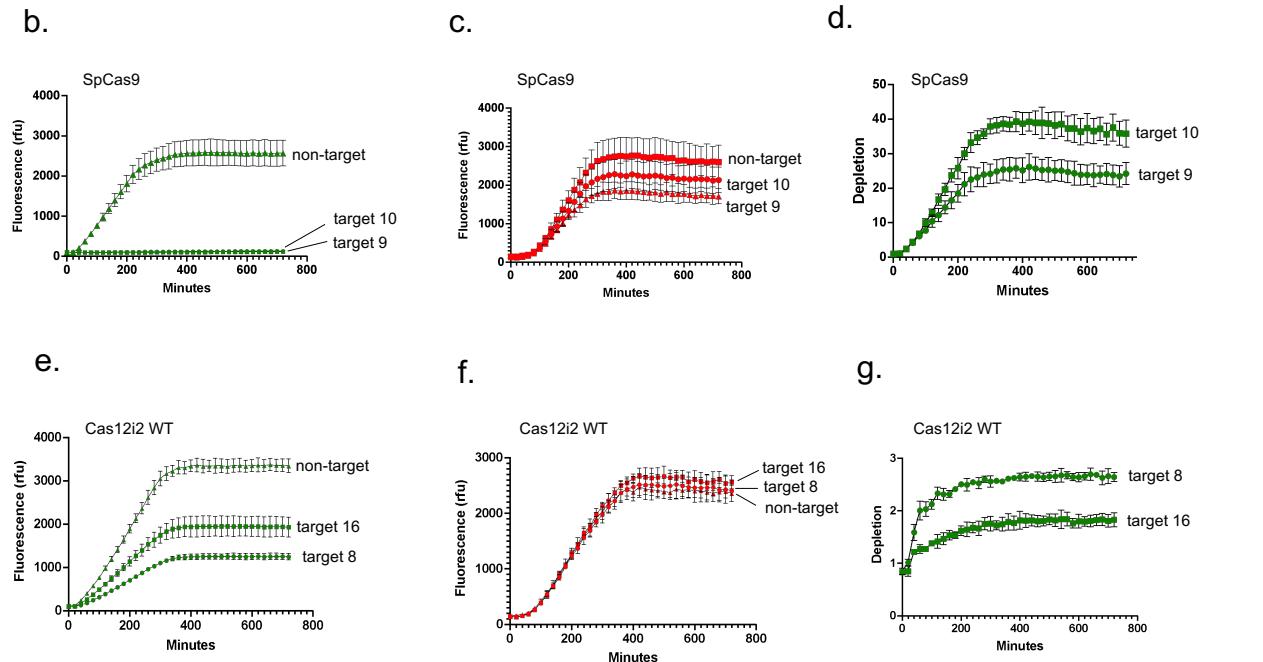

**Supplementary Fig. 4. *In vitro* fluorescent reporter assay for rapid cell-free measurement of *in vitro* activity of Cas12i2 and SpCas9.** a. Schematic description of the assay. A CRISPR Cas effector and gRNAs are expressed from T7 promoter ( $P_{T7}$ ) by T7 RNP polymerase to form a ribonucleoprotein complex (RNP). GFP and RFP reporters are expressed from a sigma 28-specific promoter (fliC) by *E. coli* RNA polymerase holoenzyme consisting of RNA polymerase core enzyme (RNAPc) and sigma 28 transcription factor, expressed from T7 promoter. When GFP target gRNA is expressed (from T7 promoter), RNP cleaves the GFP coding region before and/or during GFP expression, resulting in poor GFP expression and low GFP fluorescence. When GFP non-target gRNA is expressed, RNP cleaves a site outside of the GFP gene without affecting GFP expression. The RFP expression is not affected by RNP interference; therefore, RFP serves as an expression and fluorescence control for normalizing well-to-well variations. b-c. Time course measurement of GFP (b) and RFP (c) fluorescence of *in vitro* reactions expressing SpCas9 and gRNAs for two GFP target sites (targets 9 and 10) and one non-target site. Shapes represent mean and error bars represent s.d. of  $n=3$  replicates (target 9, 10) or  $n=12$  replicates (non-target). d. GFP signal decrease (depletion) of SpCas9 for the two GFP target sites plotted as ratios of non-target over target GFP fluorescence normalized by RFP fluorescence. Shapes represent mean and error bars represent s.d. of  $n=3$  replicates. e-f. Time course measurement of GFP (e) and RFP (f) fluorescence of *in vitro* reactions expressing Cas12i2 WT and pre-crRNAs for two GFP target sites (targets 8 and 16) and one non-target site. Shapes represent mean and error bars represent s.d. of  $n=3$  replicates (target 8, 16) or  $n=12$  replicates (non-target). g. GFP signal decrease (depletion) of Cas12i2 WT for the two GFP target sites plotted as ratios of non-target over target GFP fluorescence normalized by RFP fluorescence. Shapes represent mean and error bars represent s.d. of  $n=3$  replicates. Source Data are provided as a Source Data file.

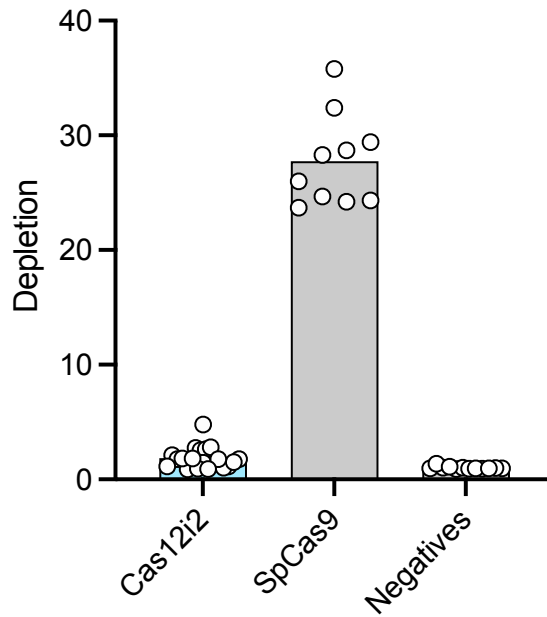

**Supplementary Fig. 5. Validation of SpCas9 and Cas12i2 WT in *in vitro* fluorescent reporter assay with additional targets.** *In vitro* activities of wild type Cas12i2 and SpCas9 at 20 and 10 GFP target sites, respectively, were measured by GFP signal decrease (depletion) in the assay. Each dot represents a single target site, averaged from n=3 replicates (n=1 for negatives) with s.d. <10%. Each bar represents the mean across all GFP targets. Source Data are provided as a Source Data file.

a.

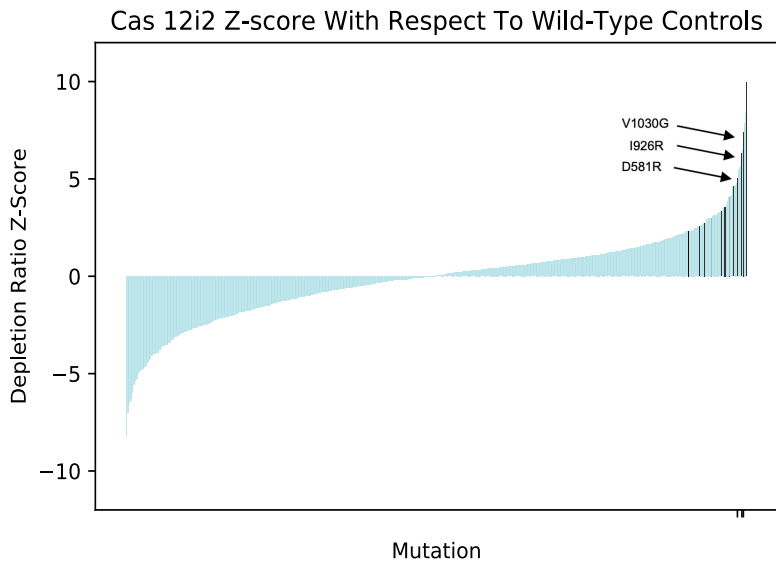

b.

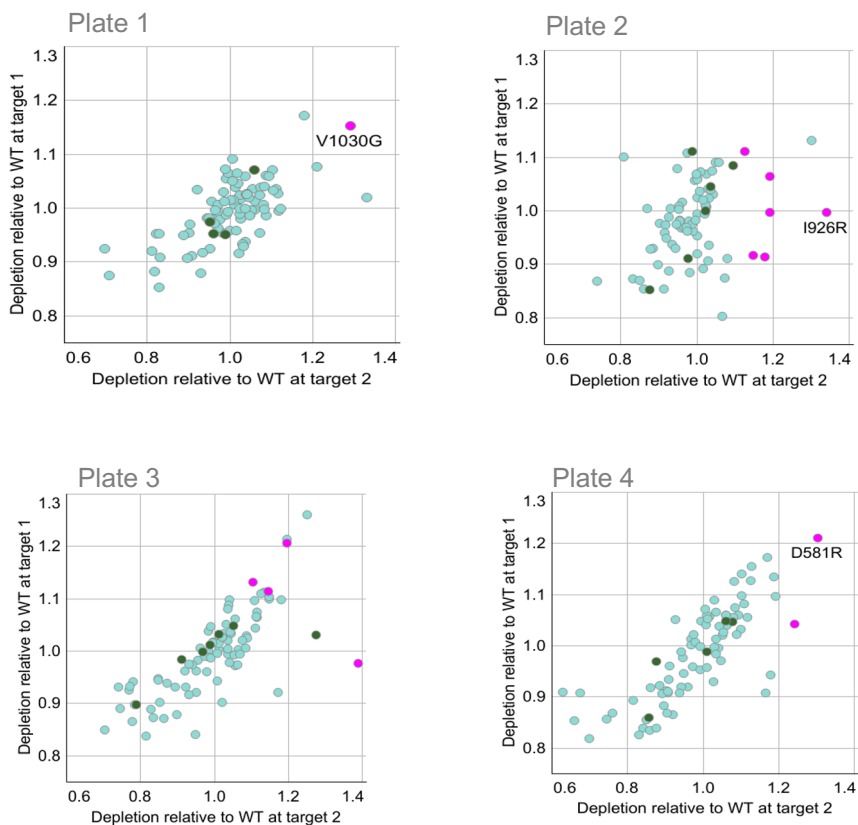

**Supplementary Fig. 6. *In vitro* screen of arginine and glycine substitutions in the fluorescent reporter assay.** a. Z-score of GFP signal decrease (depletion) relative to the means of WT controls for all arginine and glycine variants screened in the FDA, listed in ascending order. Black bars indicate the the 14 variants tested in HEK293T. b. GFP signal decrease (depletion) relative to the mean of WT controls for arginine and glycine single-substitution variants at two GFP target sites (target 1 and 2) measured from four separate 384-well plates (plates 1-4). The wild type controls (arginine-to-arginine and glycine-to-glycine substitutions) on each plate are colored in green. The single-substitution variants chosen for indel measurement in mammalian cells are colored in magenta. Each circle represents a single variant, averaged from  $n=3$  replicates with s.d. less than 20%. Three substitutions in ABR-001 are indicated. Source Data are provided as a Source Data file.

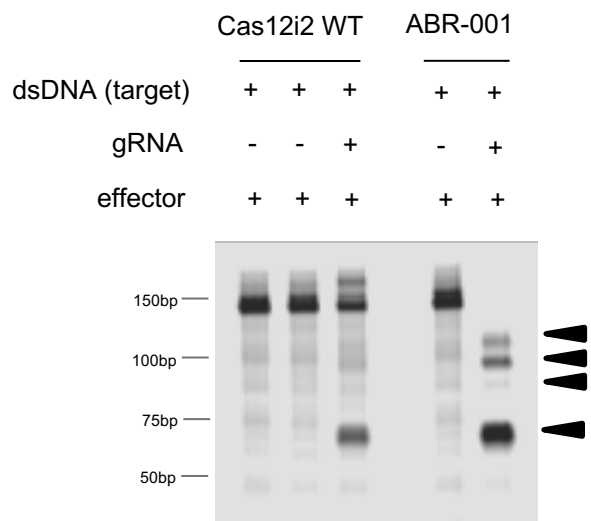

**Supplementary Fig. 7. *In vitro* cleavage of target dsDNA by purified Cas12i2 WT and ABR-001.** Black arrows represent cleavage products. The gel is a representative image of n=2 experiments. Cas12i2 WT and ABR-001 were at final concentrations of 1 $\mu$ M and 0.5 $\mu$ M, respectively. Source Data are provided as a Source Data file.

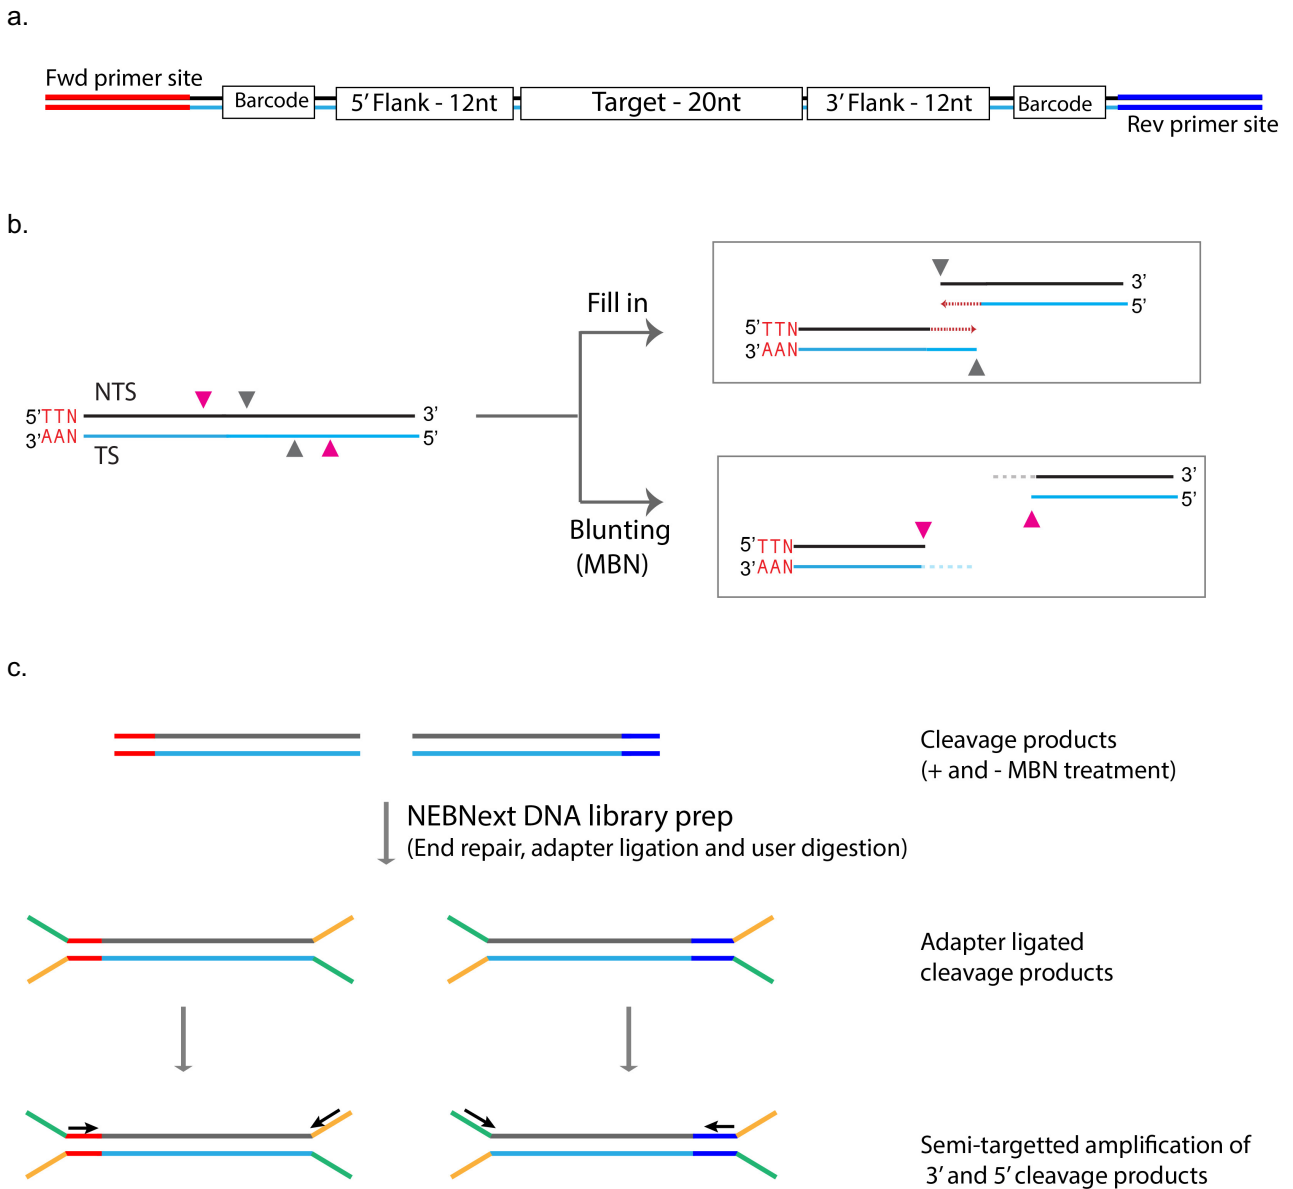

**Supplementary Fig. 8. Cut site analysis of Cas12i2 *in vitro* cleavage products.** a. Design of oligos containing target sequences for cut site analysis. In addition to target sequence and 12 nt of flank sequence on both ends of the target, the oligos contain internal barcodes and priming sites to allow for targeted amplification. b. All cleavage products are split into two halves where one half is treated with mung bean nuclease (MBN), which blunts the 5' and 3' overhangs (blunting treatment). The other half reaction is end repaired (part of NEBNext DNA library prep) which fills the 5' overhangs (fill in treatment) and blunts any 3' overhangs. Both halves are then progressed to library prep and semi-targeted amplification. Cut sites with 5' overhangs as indicated by grey arrows are captured by the fill in treatment which results in fill in of any 5' overhangs. Therefore the 5' and 3' sequencing of these products will indicate cut sites on template and non-template strand respectively (TS, NTS). Additional cut sites shown in pink may be captured by a blunting method that blunts all 5' and 3' overhangs. As a result, 5' cleavage products in blunting method indicate any additional cut sites on the NTS and the 3' cleavage products indicate additional cut sites on the TS c. Semi-targeted amplification after NEBNext adapter ligation allows for specific amplification of 5' and 3' cleavage products. The amplified products are pooled and read out by NGS.

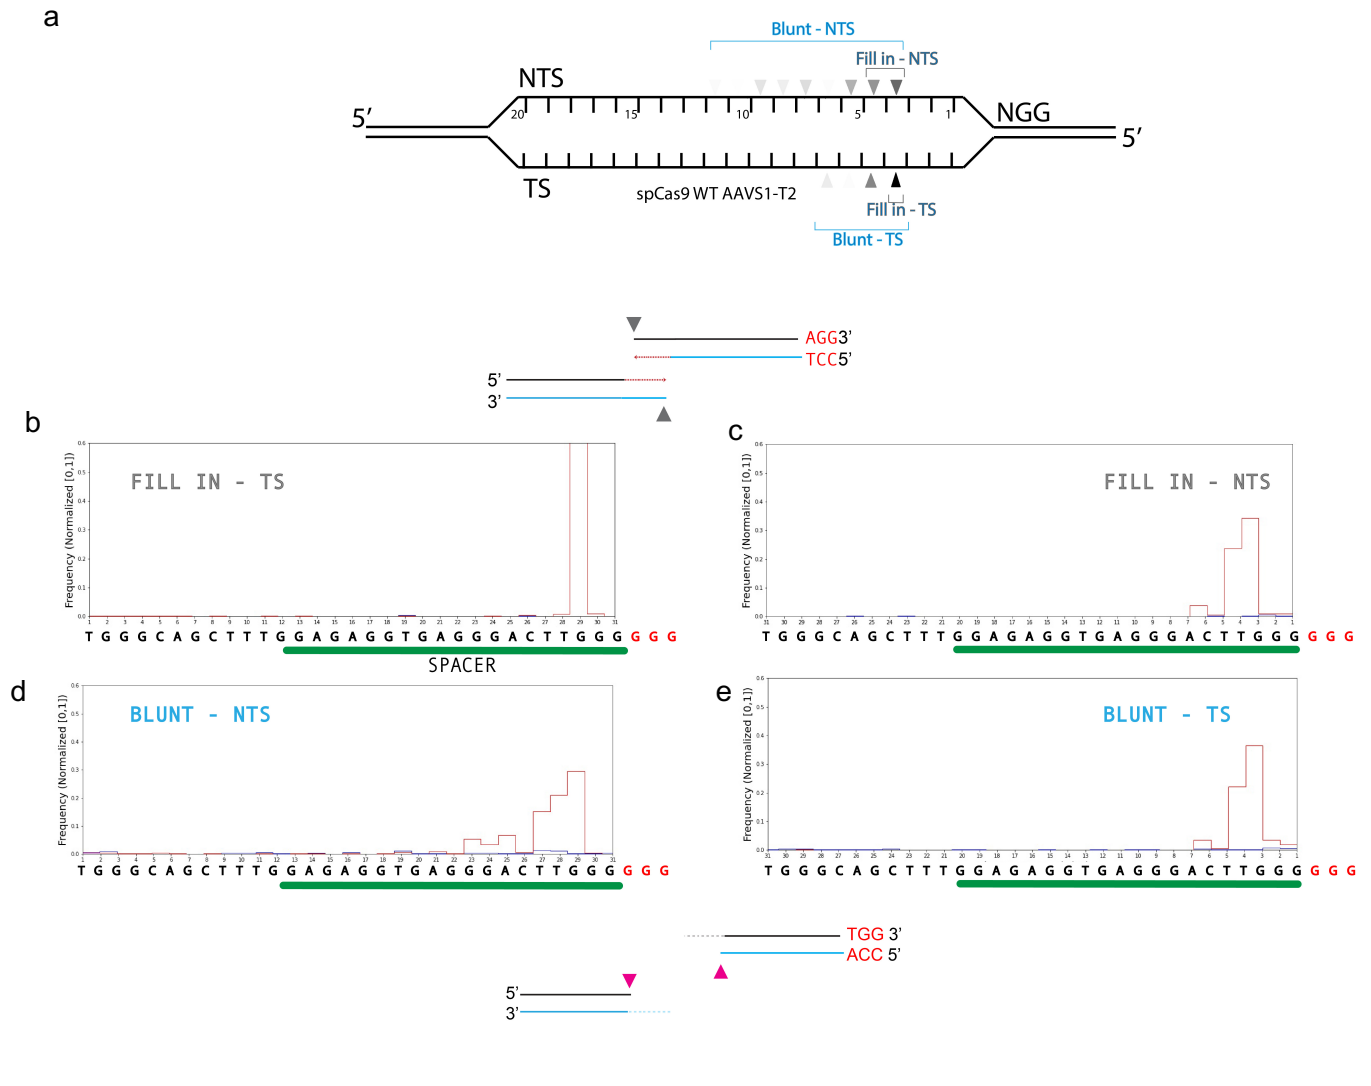

**Supplementary Fig. 9. Cut site analysis of Cas9 cleavage products for AAVS1-T2.** NGS read out of Cas9 cleavage products. b-e. Histogram of read lengths obtained from semi-targeted amplification of 5' and 3' cleavage products. b and d show read length histograms of 5' cleavage products for fill-in and blunting treatment respectively. c and e show read length histograms for 3' cleavage products for fill-in and blunting treatment respectively. Each read length histogram is mapped to the target sequence as shown on the x-axis. The PAM is indicated in red. The cut sites obtained from read length histograms are illustrated in the R-loop diagram shown in (a). 5' and 3' read length histograms for fill-in treatment indicate the cut site on template strand (TS) and Non-template strand (NTS) respectively. 5' and 3' read length histograms for blunting treatment indicate the cut site on non-template strand (NTS) and template strand (TS) respectively



a

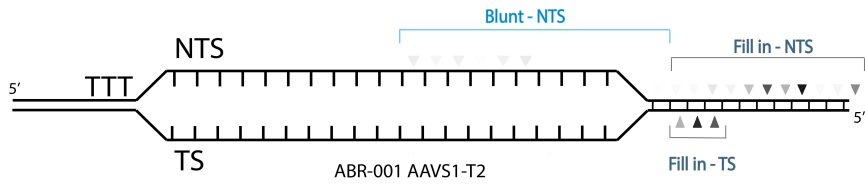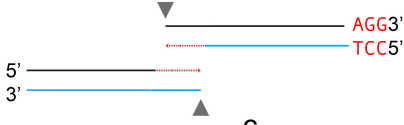

b

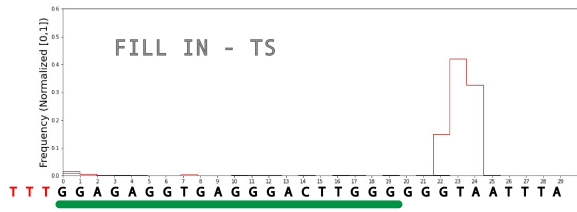

c

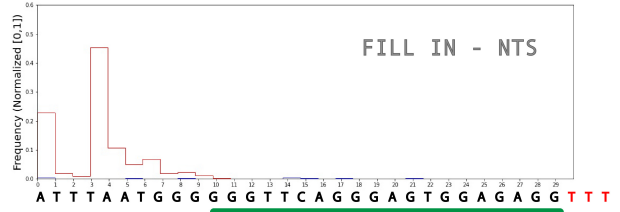

d

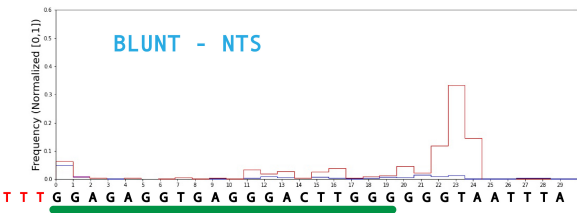

e

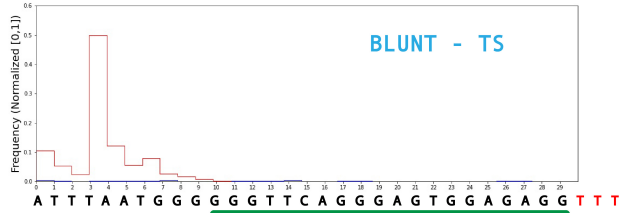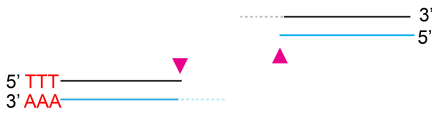

**Supplementary Fig. 10. Cut site analysis of ABR-001 cleavage products for AAVS1-T2.** NGS readout of ABR-001 cleavage products. b-e. Histogram of read lengths obtained from semi-targeted amplification of 5' and 3' cleavage products for fill-in and blunting treatment, respectively. b and d show read length histograms of 5' cleavage products for fill-in and blunting treatment, respectively. c and e show read length histograms for 3' cleavage products for fill-in and blunting treatment, respectively. Each read length histogram is mapped to the target sequence as shown on the x-axis. The PAM is indicated in red. The cut sites obtained from read length histograms are illustrated in the R-loop diagram shown in (a). 5' and 3' read length histograms for fill-in treatment indicate the cut site on template strand (TS) and Non-template strand (NTS) respectively. 5' and 3' read length histograms for blunting treatment indicate the cut site on non-template strand (NTS) and template strand (TS) respectively. Since blunting treatment blunts both 5' and 3' overhangs, the cut sites resulting from fig e (3' blunted cleavage products) could result either from the cuts on NTS (already captured by the fill in method) or on the TS. Due to this ambiguity the cut sites indicated in fig. e were not assigned to either strand.

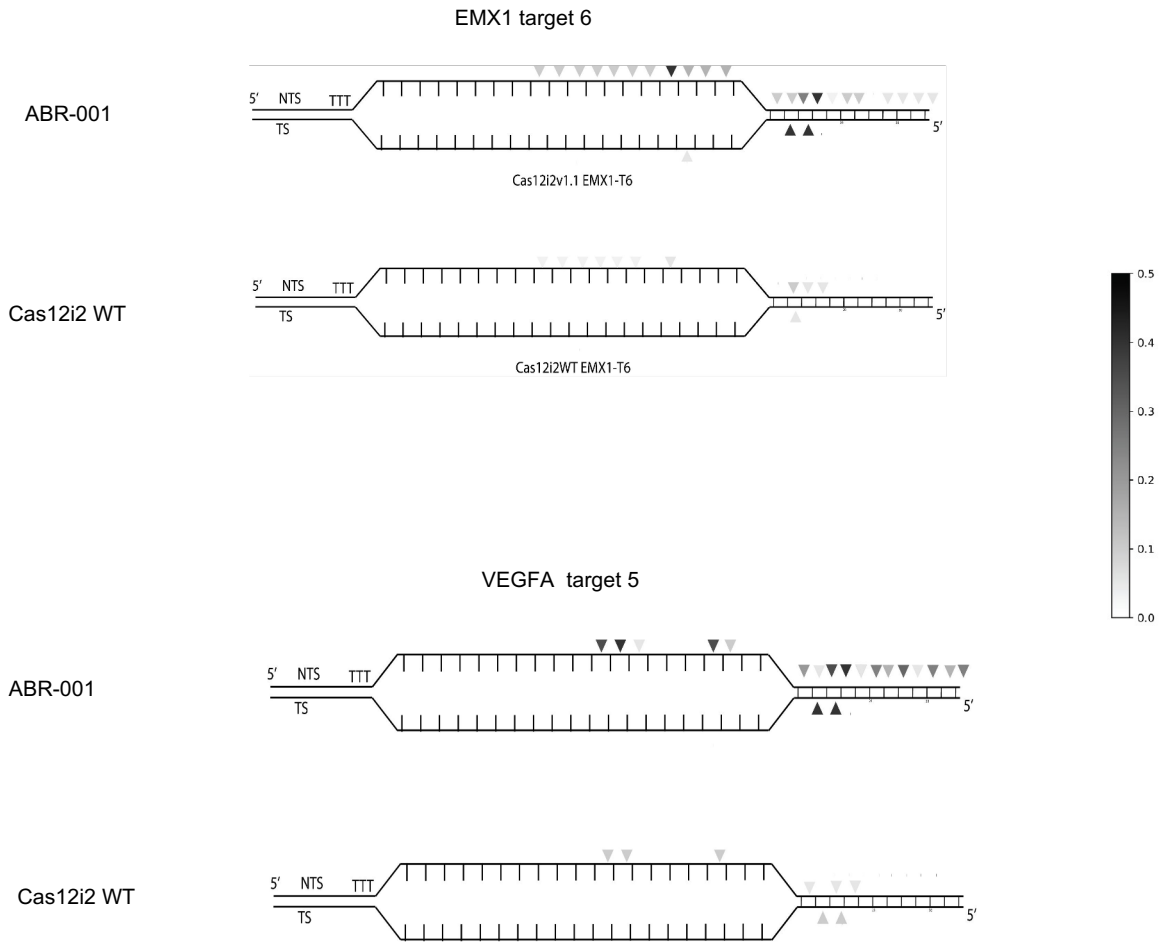

**Supplementary Fig. 11. Additional *in vitro* cut site analysis for ABR-001 and Cas12i2 WT.** Shown are *in vitro* cleavage sites (triangles) of ABR-001 and Cas12i2 WT (TTT PAM) on the template (TS) and non-template (NTS) strands of EMX1 target 6 and VEGFA target 5, analyzed by deep sequencing. The scale bar (right) represents the cleavage frequency as measured by the number of sequencing reads.

Supplementary Fig. 12

a.

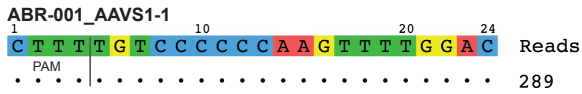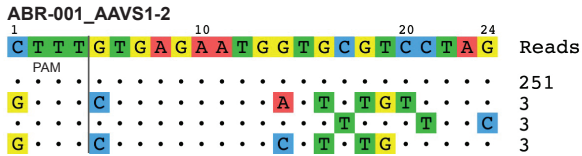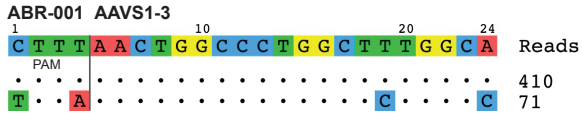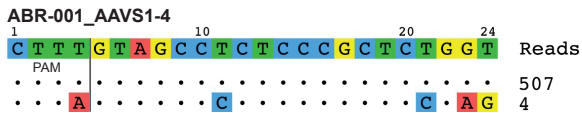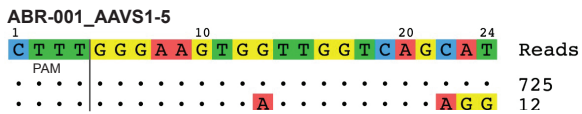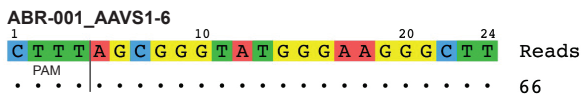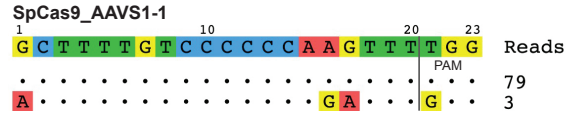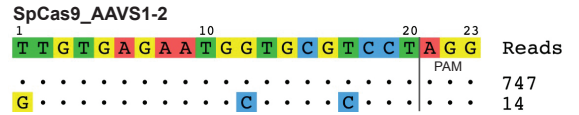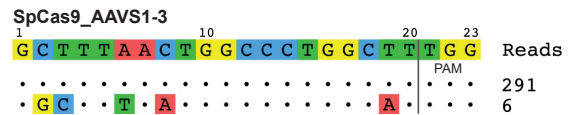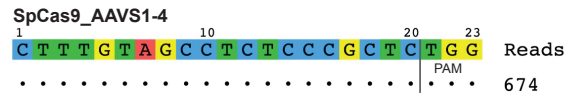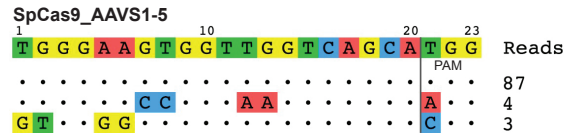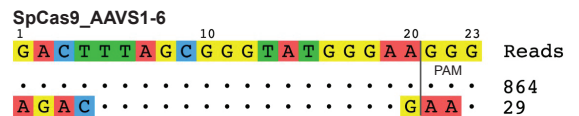

b.

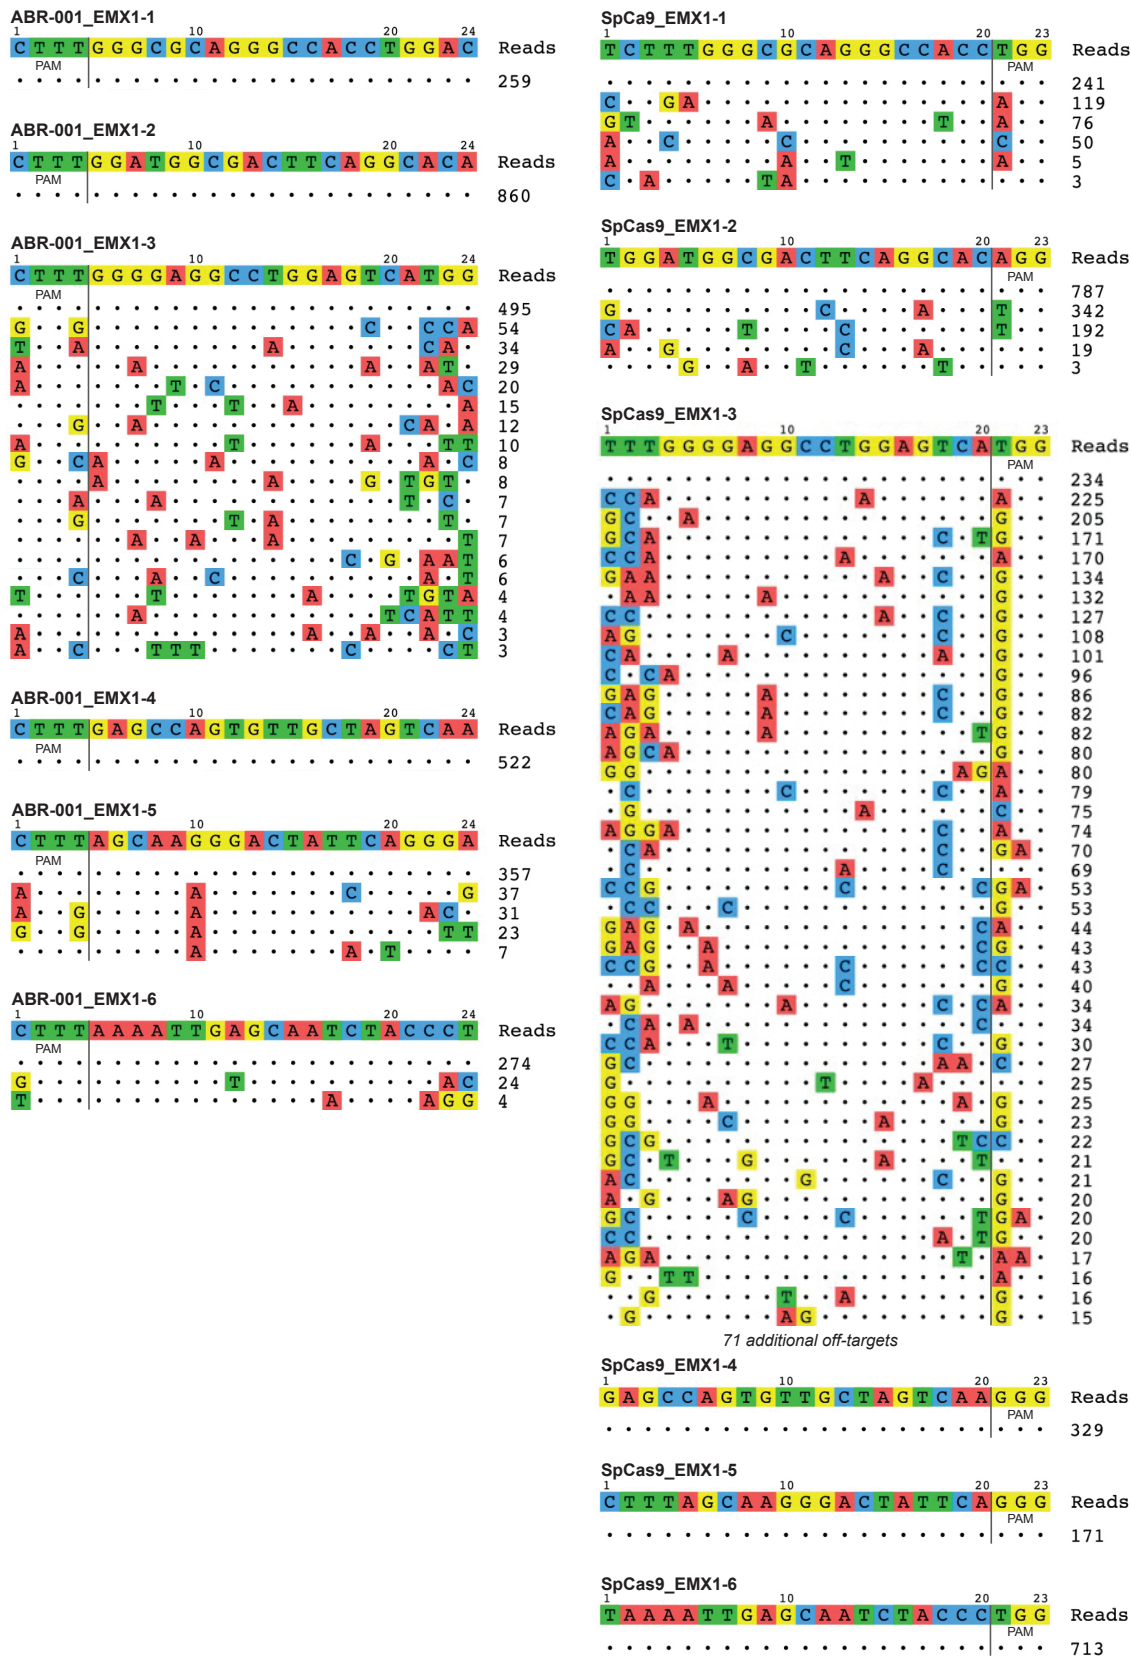

C.

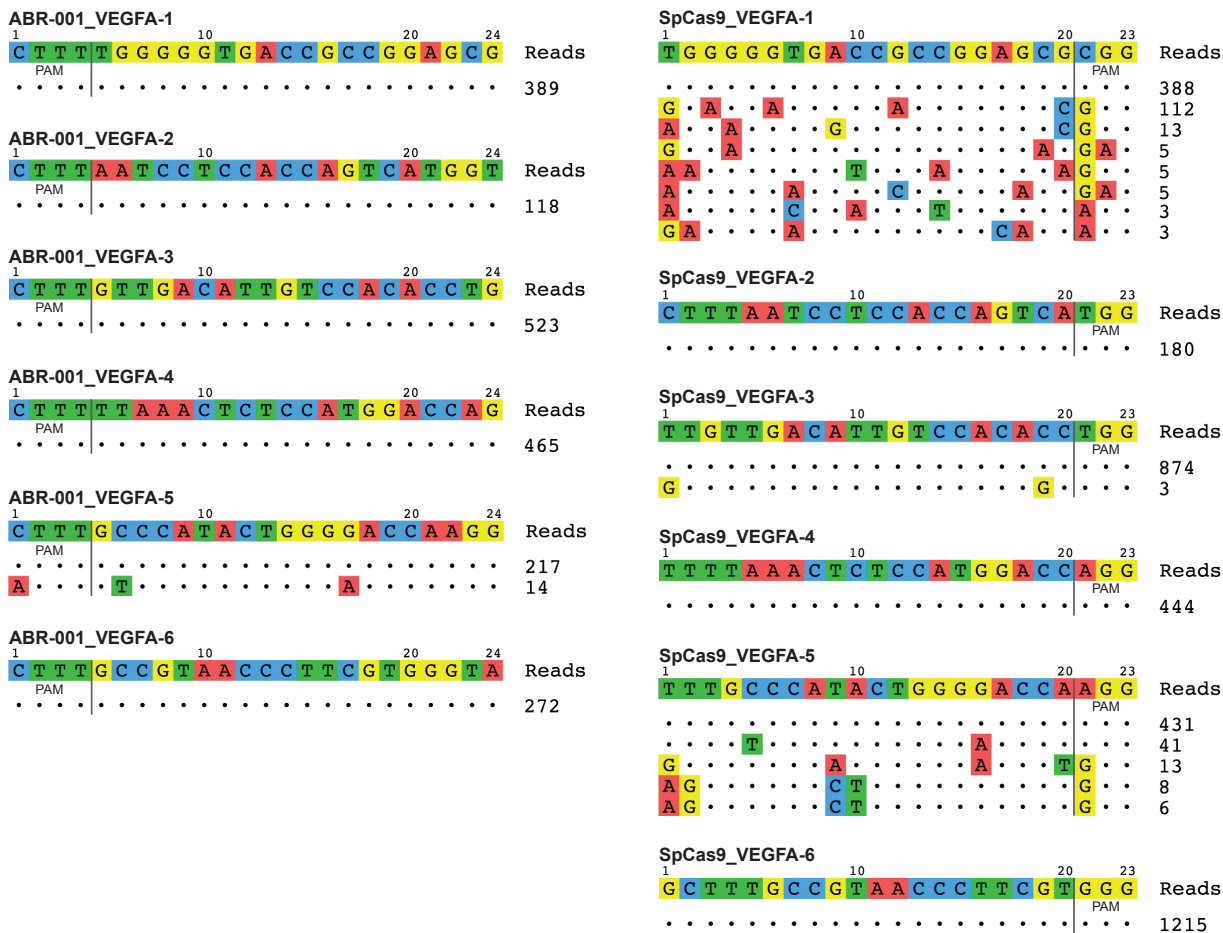

**Supplementary Fig. 12. Additional TTISS data of ABR-001 and SpCas9 at six targets for each of AAVS1 (a), EMX1 (b), and VEGFA (c).** Dots indicate a nucleotide at which the off-target matches the on target. Letters with a colored background indicate the identify of a mismatch. Read counts represents unique reads.

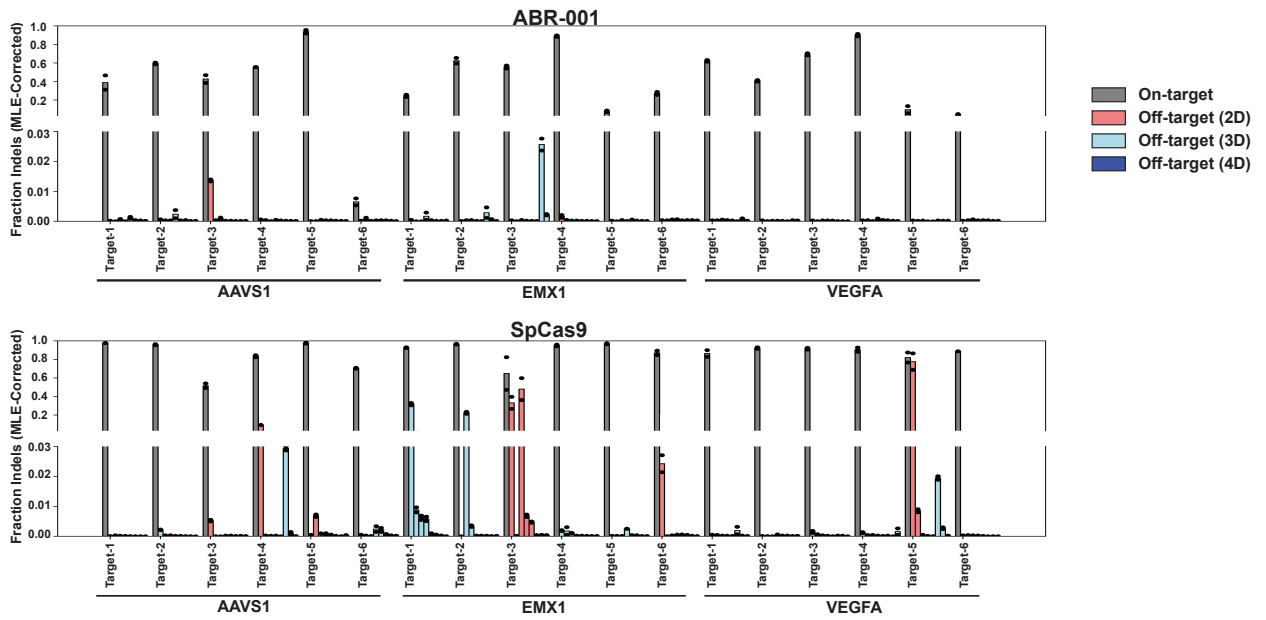

**Supplementary Fig. 13. Measurement of computationally-predicted off targets for ABR-001 and SpCas9 delivered by RNP.** Gray bars indicate fraction of reads showing indels at on-targets. Colored bars indicate fraction of reads showing indels at off targets of levenshtein distance 2D (pink), 3D (light blue), and 4D (dark blue). Technical background has been removed by maximum likelihood estimation. Source Data are provided as a Source Data file.

**A**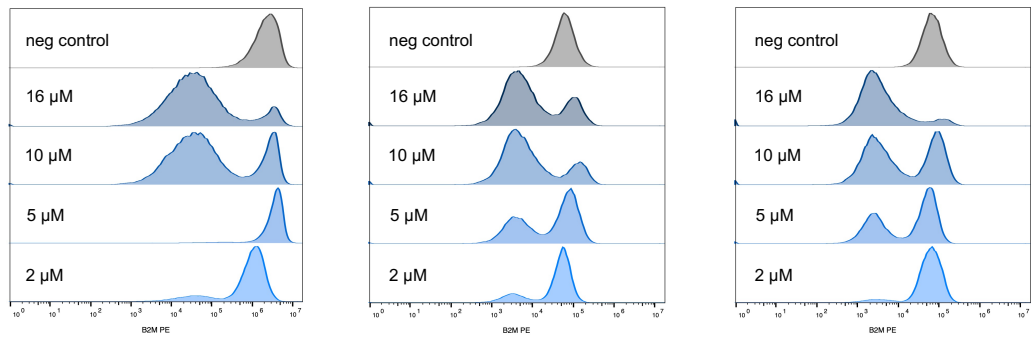**B**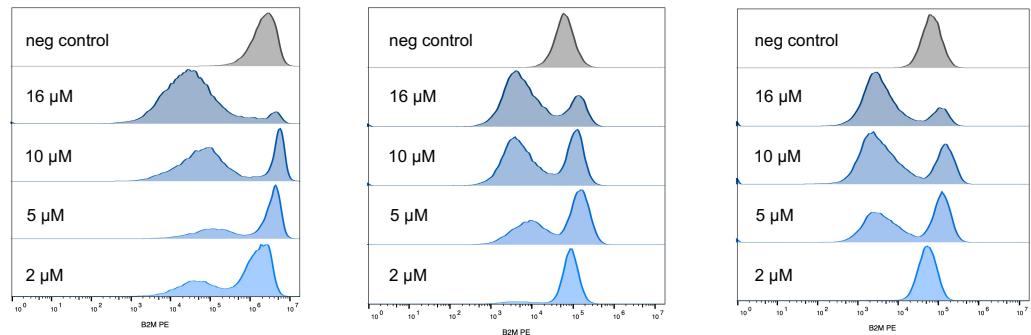**C**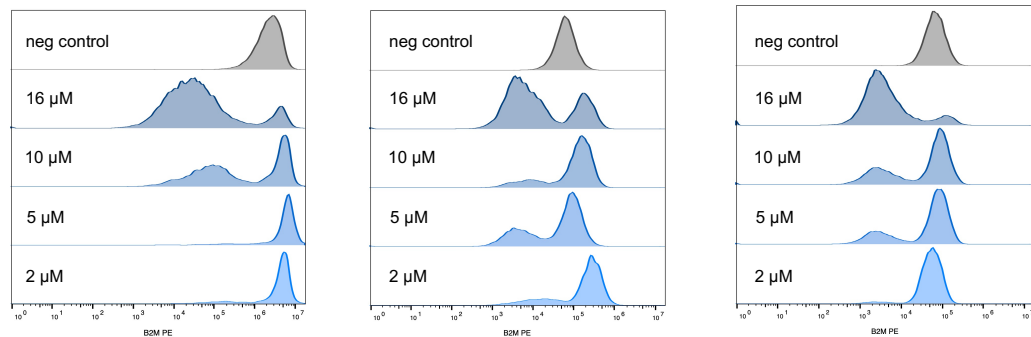**D**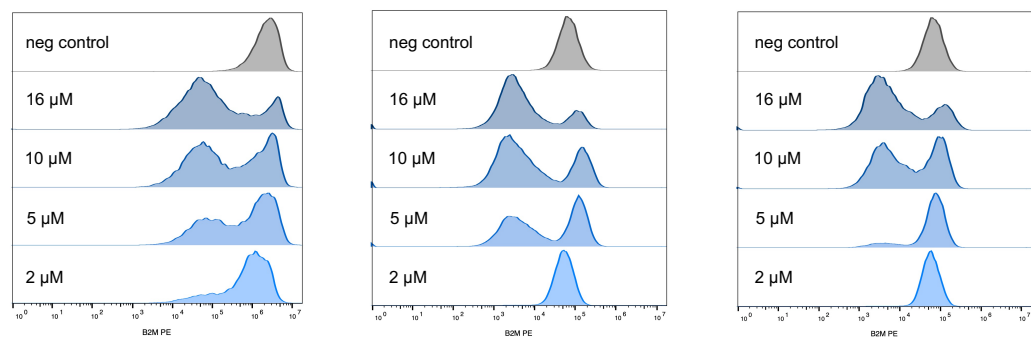

**Supplementary Fig. 14. ABR-001 enables protein knockdown of B2M in T cells.** Histograms show B2M protein level knockdown at 7 days post electroporation with ABR-001 RNP with B2M guide 1 (A), guide 2 (B), guide 3 (C), or guide 4 (D) at decreasing concentrations (16 $\mu$ M, 10 $\mu$ M, 5 $\mu$ M, and 2 $\mu$ M). Each panel represents one technical replicate. Y-axes represents count normalized to mode.

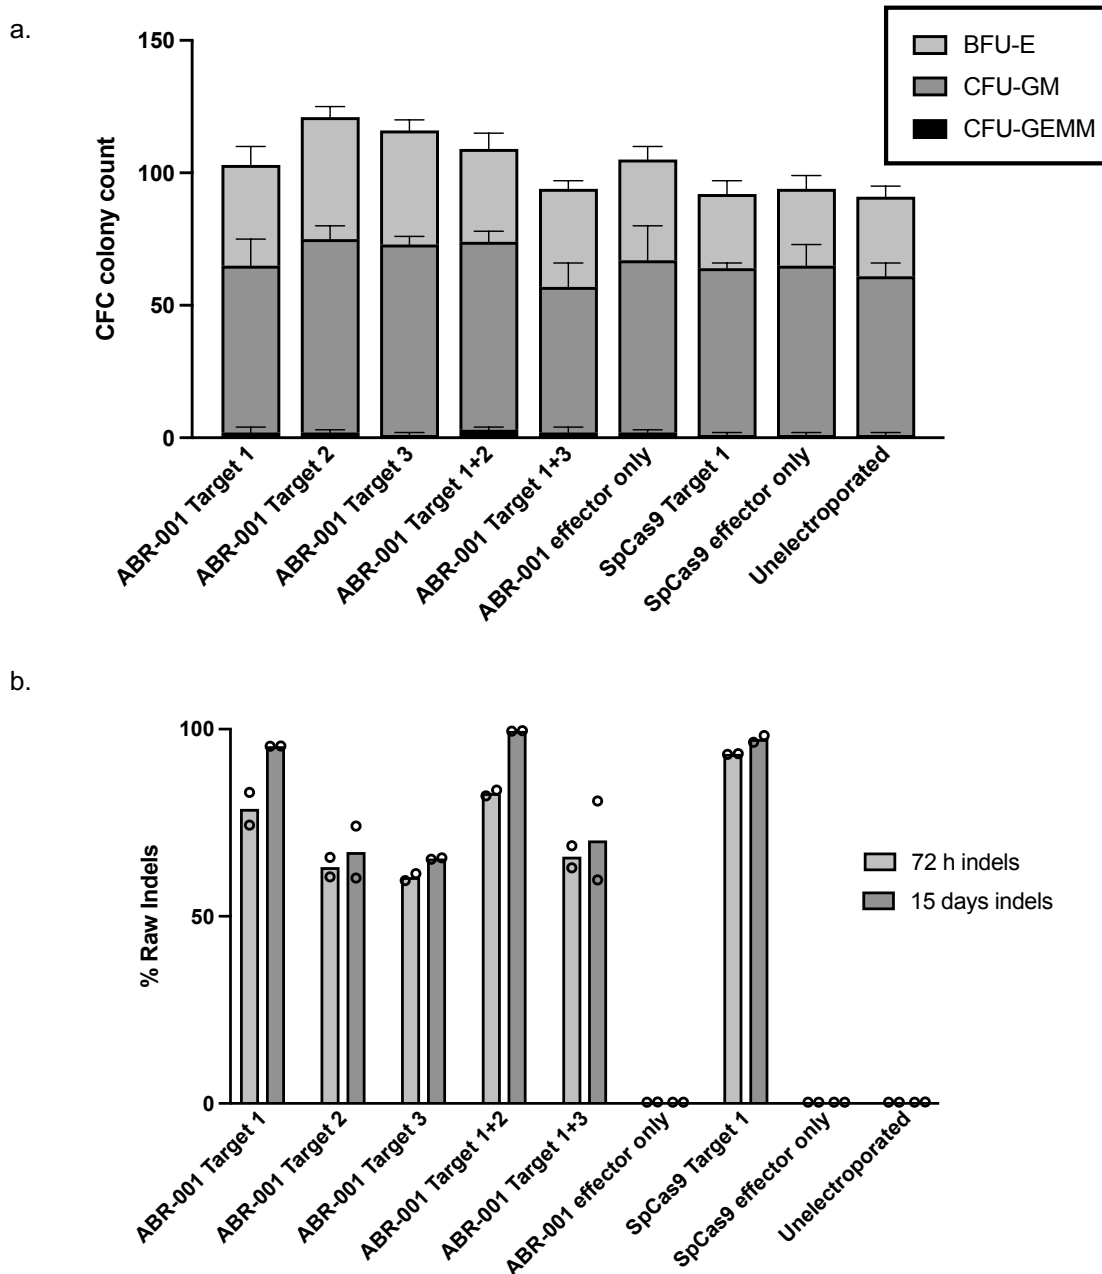

**Supplementary Fig. 15. ABR-001 edited CD34<sup>+</sup> HSPCs maintain indels and multilineage reconstitution.** a. CFC colony counts at day 15 post plating. Erythroid (BFU-E), myeloid (CFU-GM), and mixed (CFU-GEMM) colony counts are shown. Bars represent the average colony counts of three technical replicates from a representative donor, and error bars represent the standard deviation of the mean for three technical replicates b. Indel rates at the BCL11A enhancer in CD34<sup>+</sup> HSPCs at 72 h post electroporation and in isolated CFC colonies at 15 days post plating. ABR-001 RNP and effector only samples were transfected at a final concentration of 16  $\mu$ M, and SpCas9 RNP and effector only samples were transfected at a final concentration of 5  $\mu$ M. Bars at 72 h represent the average of two biological replicates (i.e. two separate donors). Bars at 15 days represent the average indels from 24 CFU-GM colonies 12 BFU-E sequenced colonies. Each dot represents a single replicate. Source Data are provided as a Source Data file.



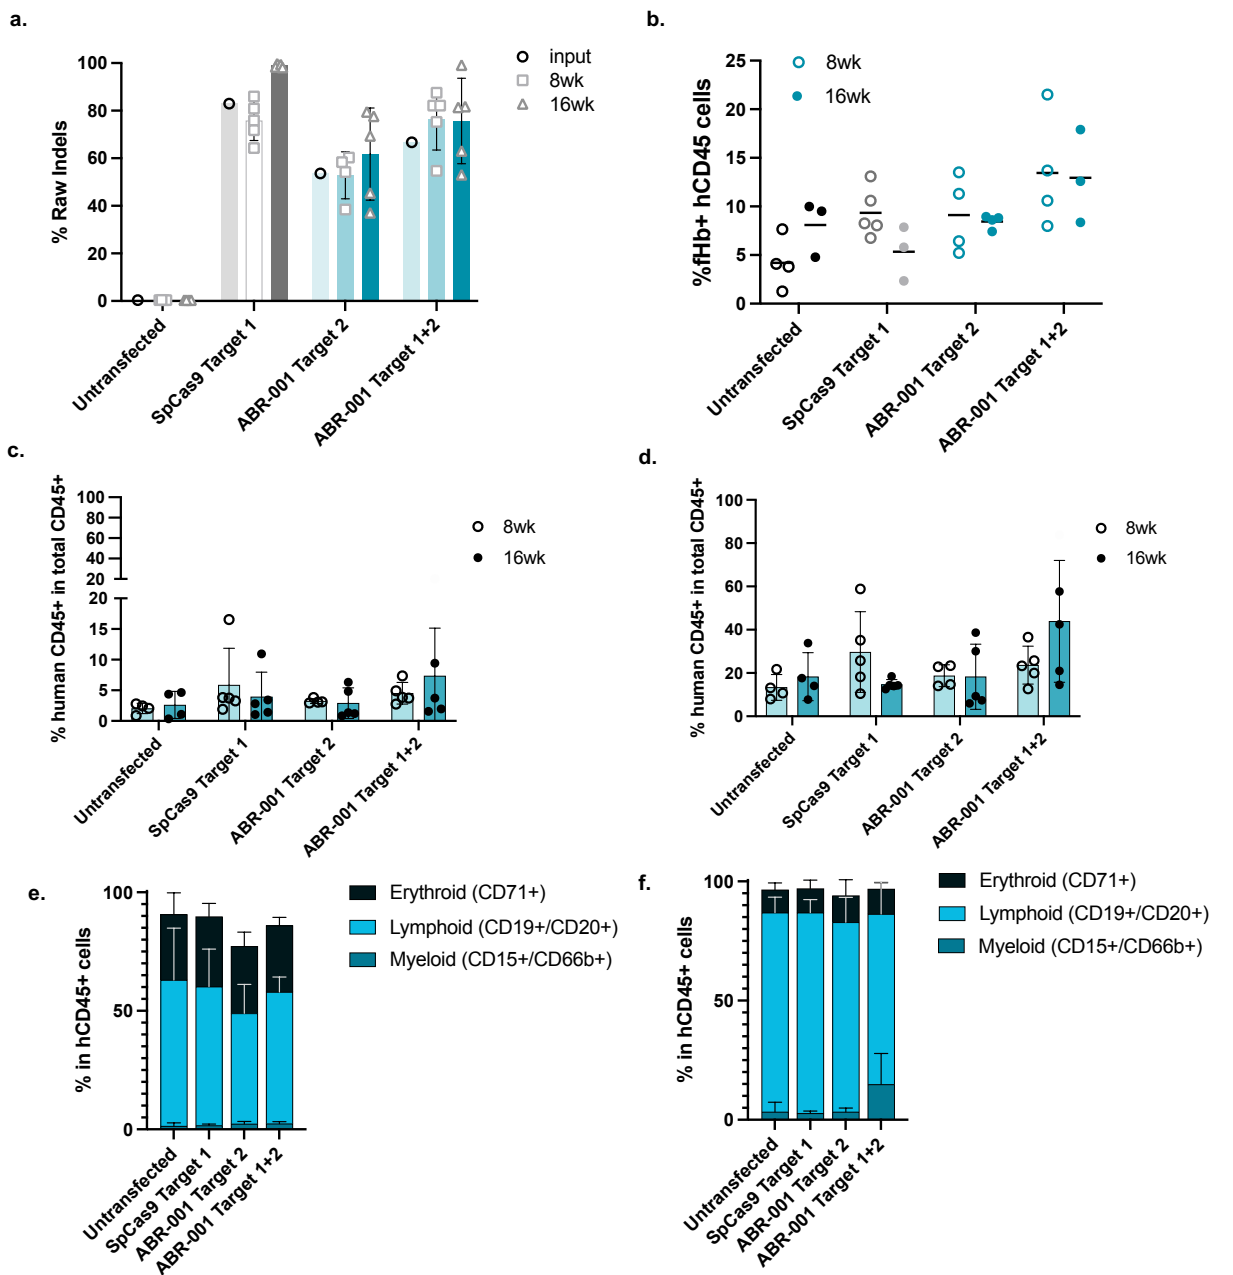

**Supplementary Fig. 16. ABR-001 edited cells retain engraftment capacity and functionality, upon transplantation in immunodeficient mice.** a. Indel rates at the time of adoptive transfer and 8 and 16 weeks post-transplantation of hCD34<sup>+</sup> cells, edited with guides targeting the BCL11a enhancer and adoptively transferred into sub-lethally irradiated NOD-SCID mice at a dose of 200,000 cells/mouse. Bars for 8 and 16 weeks represent the mean and error bars represent s.d. of n=4 (Untransfected 8wk and 16wk, ABR-001 Target2 8wk) or 5 mice (SpCas9 Target1 8wk and 16wk, ABR-001 Target2 16wk, ABR-001 Target1+2 8wk and 16wk). Squares and triangles represent a given mouse at 8 and 16 weeks, respectively. The input represents the CD34<sup>+</sup> population that was engrafted, represented by a circle (n=1). b. HbF analysis in mouse bone marrow was done by intracellular flow cytometry at 8 and 16 weeks post transplantation. Bars represent the mean of n=3 (Untransfected 16wk, SpCas9 Target1 16wk, ABR-001 Target1+2 16wk), 4 (Untransfected 8wk, ABR-001 Target1+2 8wk, ABR-001 Target2 8wk and 16wk), or 5 mice (SpCas9 Target1 8wk), with each dot representing a mouse. c-d. Mouse peripheral blood (c) and bone marrow (d) was assessed for % human chimerism by flow cytometry at 8 weeks and 16 weeks post transplantation. Bars represent mean and error bars represent s.d. of n=4 (Untransfected 8wk and 16wk, ABR-001 Target2 8wk) or 5 (SpCas9 Target1 8wk and 16wk, ABR-001 Target2 16wk, ABR-001 Target1+2 8wk and 16wk) replicates, with each dot representing a mouse. e-f. Different lineage marker analysis of mouse peripheral blood (e) and bone marrow (f) by flow cytometry at 16 weeks post transplantation. Bars represent the mean. Error bars represent s.d. of n=4 replicates (Untransfected) or n=5 replicates (SpCas9 and ABR-001). Source Data are provided as a Source Data file.

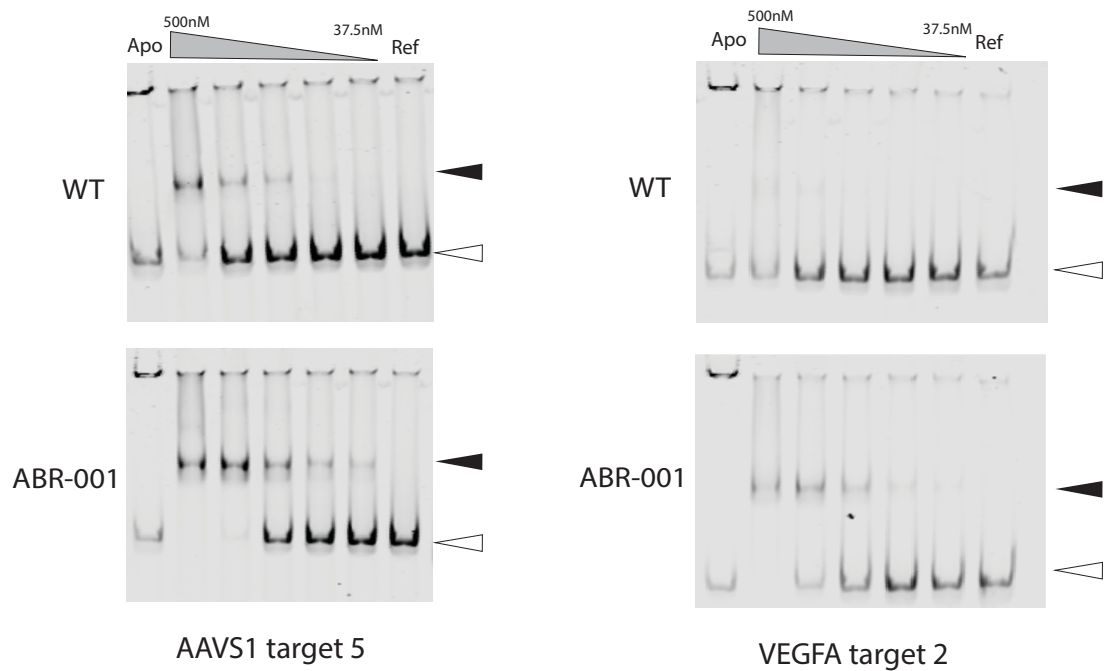

**Supplementary Fig. 17. ABR-001 exhibits enhanced target DNA binding.** Electrophoretic mobility shift analysis (EMSA) of Cas12i2 WT and ABR-001 binding of target dsDNA. Open arrows indicate unbound dsDNA. Black arrows indicate dsDNA bound to increasing concentrations of RNP (effector and gRNA complex). dsDNA alone is labeled as Ref, and effector protein alone as Apo. The gel is a representative image of n=2 experiments. Source Data are provided as a Source Data file.

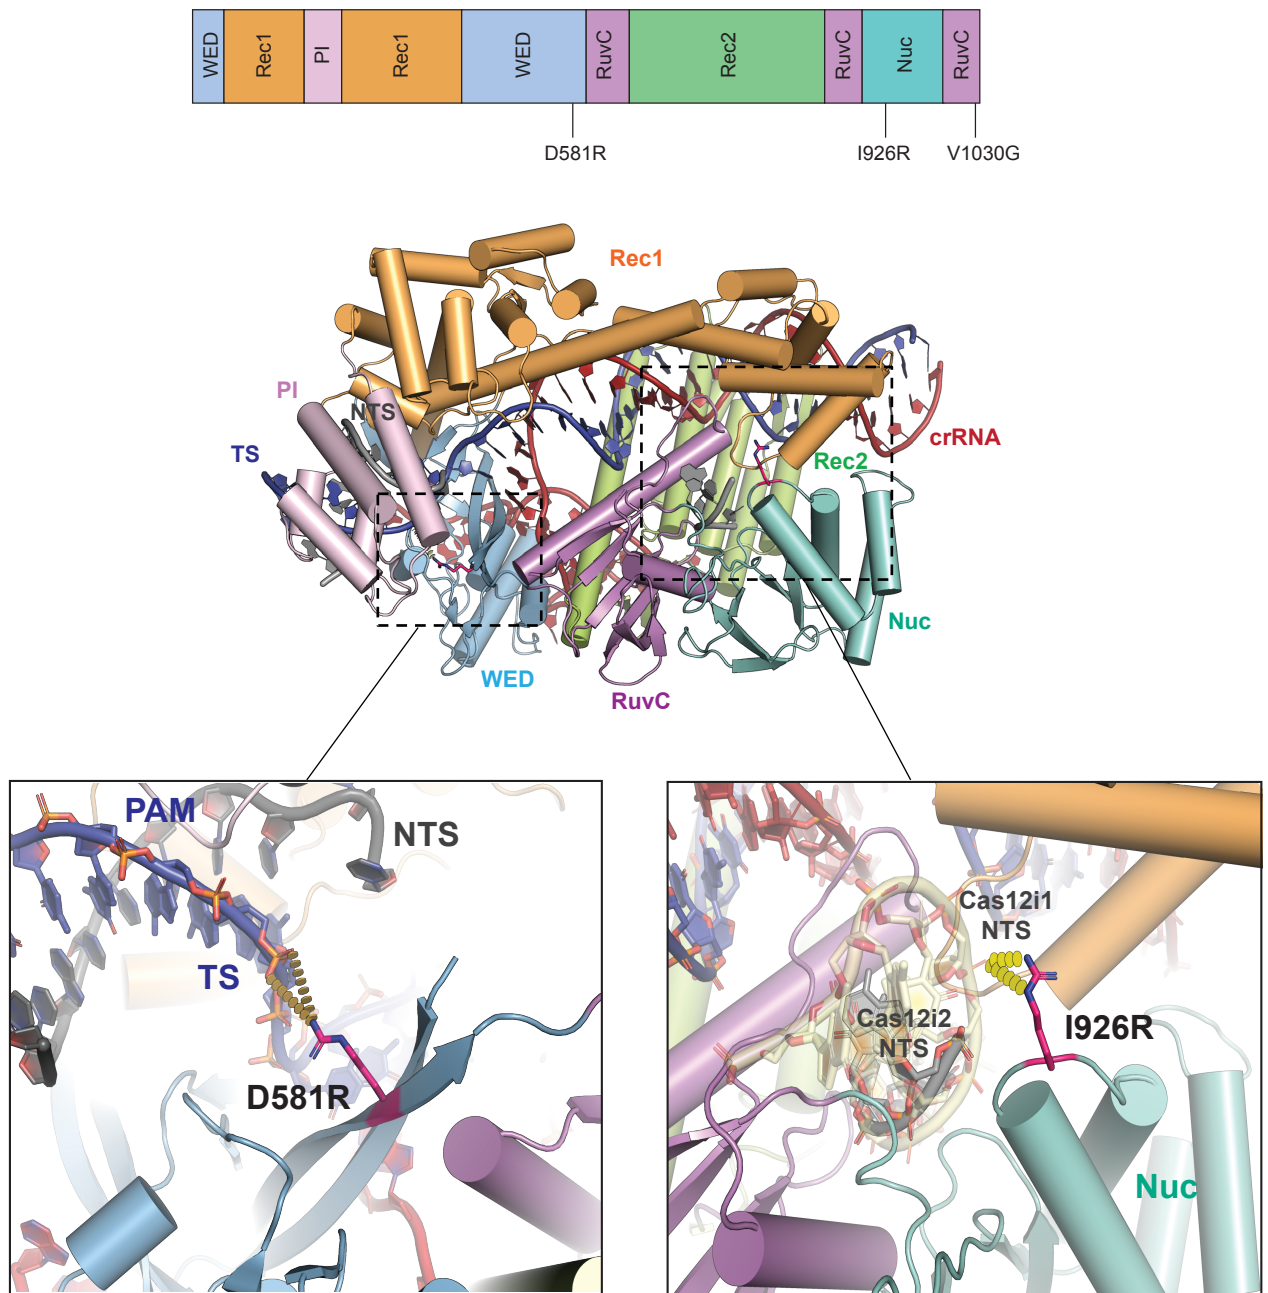

**Supplementary Fig. 18. Mapping of ABR-001 indel enhancing substitutions in Cas12i2 structure.** ABR-001 contains three indel enhancing substitutions, D581R, I926R and V1030G, located in WED, Nuc and WED domains, respectively. Shown are models of D581R and I926R forming electrostatic interactions with DNA backbones of the template strand (TS, D581R, left inset) and the non-template strand (NTS, I926R, right inset) based on the Cas12i2 ternary structure (PDB ID: 6LTU). Due to the lack of Cas12i2 local NTS (dark grey) structural information, a portion of Cas12i1 NTS (light grey) (PDB ID: 7EU9) is added to allow modeling of I926R interaction with NTS.

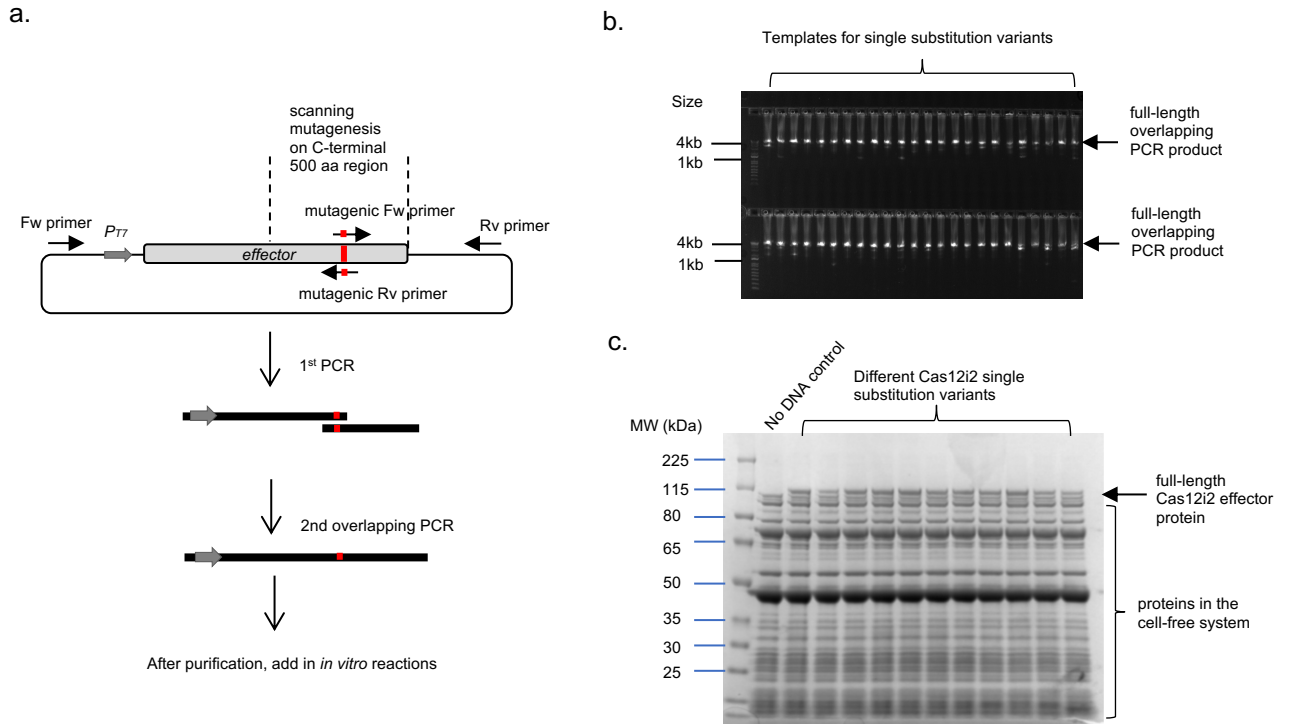

**Supplementary Fig. 19. Generation of linear DNA templates for *in vitro* expression of Cas12i2 single substitution variants.** a. Schematic description of a two-step overlapping PCR mutagenesis method for generating linear DNA templates for *in vitro* expression of single-substitution effector variants. b. A representative image of agarose gel showing the full-length products from the overlapping PCR method. The gel is a representative image of n=10 experiments. c. A representative image of Coomassie stained SDS-PAGE gel showing *in vitro* expression of a subset of Cas12i2 single substitution variants in the reconstituted cell-free system from linear DNA templates. The gel is a representative image of n=3 experiments. Source Data are provided as a Source Data file.

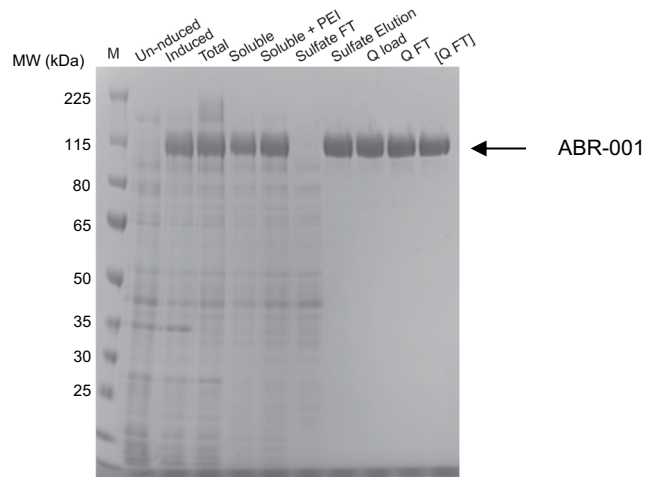

**Supplementary Fig. 20. Expression and purification of ABR-001.** A representative image of Coomassie stained SDS-PAGE gel showing cell lysate aliquots and column elution fractions from expression and purification experiments of ABR-001. See details in Methods. B. . Additional deep sequencing analysis of *in vitro* cleavage positions of ABR-001 and Cas12i2 WT on the template (TS) and non-template (NTS) strands of EMX1 target 6 and VEGFA target 5. The gel is a representative image of n=2 experiments. Source Data are provided as a Source Data file.

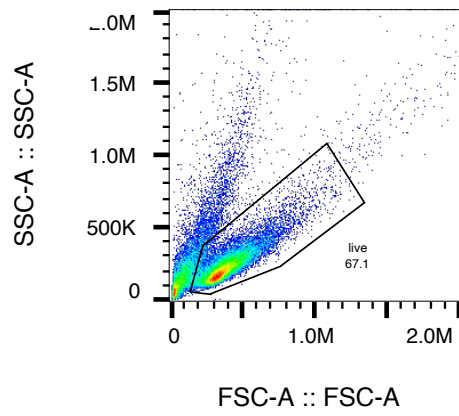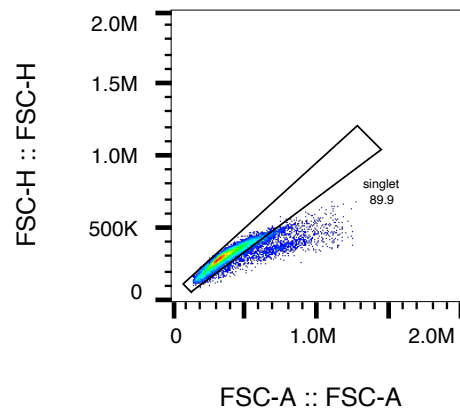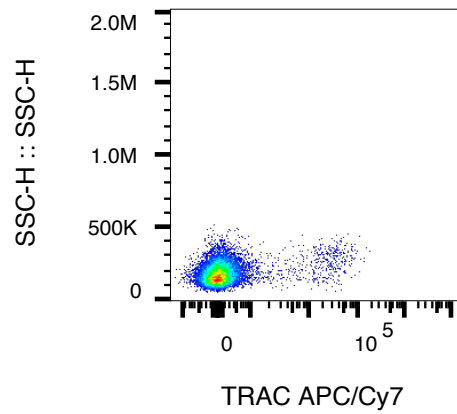

Supplementary Fig. 21. Flow cytometry gating strategy for edited CD3<sup>+</sup> T cells.

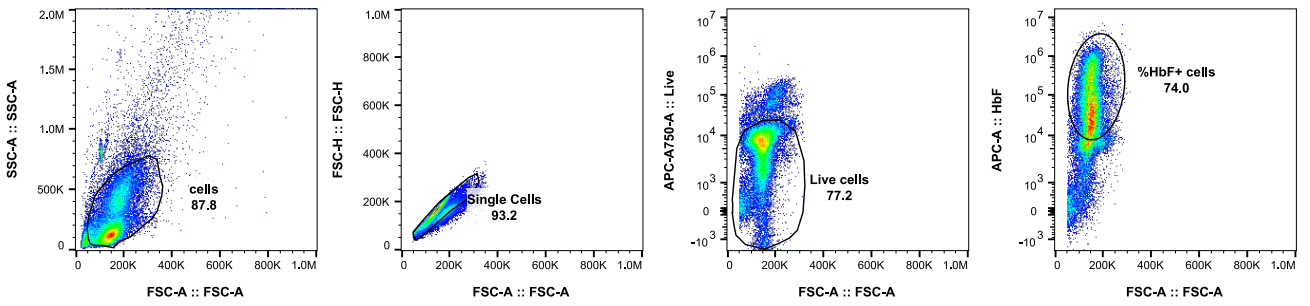

**Supplementary Fig. 22. Flow cytometry gating strategy for edited CD34+ HSPCs.** Plots show representative example ABR-001 Target 2 for data shown in in Fig. 3k.

## Supplementary References

1. Shimizu Y, *et al.* Cell-free translation reconstituted with purified components. *Nat Biotechnol* **19**, 751-755 (2001).
2. Shimizu Y, Kanamori T, Ueda T. Protein synthesis by pure translation systems. *Methods* **36**, 299-304 (2005).
3. Jinek M, Chylinski K, Fonfara I, Hauer M, Doudna JA, Charpentier E. A programmable dual-RNA-guided DNA endonuclease in adaptive bacterial immunity. *Science* **337**, 816-821 (2012).
4. Zetsche B, *et al.* Cpf1 is a single RNA-guided endonuclease of a class 2 CRISPR-Cas system. *Cell* **163**, 759-771 (2015).
5. Strecker J, *et al.* Engineering of CRISPR-Cas12b for human genome editing. *Nat Commun* **10**, 212 (2019).
6. Liu JJ, *et al.* CasX enzymes comprise a distinct family of RNA-guided genome editors. *Nature* **566**, 218-223 (2019).
7. Harrington LB, *et al.* Programmed DNA destruction by miniature CRISPR-Cas14 enzymes. *Science* **362**, 839-842 (2018).
8. Karvelis T, *et al.* PAM recognition by miniature CRISPR-Cas12f nucleases triggers programmable double-stranded DNA target cleavage. *Nucleic Acids Res* **48**, 5016-5023 (2020).
9. Bigelyte G, *et al.* Miniature type V-F CRISPR-Cas nucleases enable targeted DNA modification in cells. *Nat Commun* **12**, 6191 (2021).
10. Pausch P, *et al.* DNA interference states of the hypercompact CRISPR-CasPhi effector. *Nat Struct Mol Biol* **28**, 652-661 (2021).
11. Pausch P, *et al.* CRISPR-CasPhi from huge phages is a hypercompact genome editor. *Science* **369**, 333-337 (2020).
12. Yan WX, *et al.* Functionally diverse type V CRISPR-Cas systems. *Science* **363**, 88-91 (2019).
